# Supplementary material for: Risk of Candida Infection and Serious Infections in Patients with Moderate‐to‐Severe Psoriasis Receiving Biologics: A Systematic Review and Meta‐Analysis of Randomized Controlled Trials
Source: Hindawi journal article supplement (doi:10.1155/2022/2442603), 2022-01-01
Supplement: f1 [file 2442603.f1.pdf]

**Table and Figure legends:**

**Table 1:** Full search strategy. RCT: randomize controlled trials; IL: interleukin; TNFi: tumor necrosis factor inhibitors.

**Table 2:** Characteristics of randomize controlled trials (RCTs) included in the analysis. The basic information of the 48 included articles, which contained data from 52 RCTs with 27297 participants (the first author and published year of the article; the registration name and number of RCT; the countries and the clinical centers where RCTs were conducted; the the length of randomized controlled phase; the basic characteristics of the patients who were enrolled; the proportion of patients with psoriatic arthritis; the Psoriasis Area and Severity Index [PASI] score; the criteria for moderate-to-severe psoriasis; the recent history of serious infections).

**Figure 1:** Forest plot of pooled data of biological agents versus placebo on serious infections. There was no statistically significant difference in the risk of serious infections for patients receiving tumor necrosis factor inhibitors (TNFi), anti-interleukin (IL)-17 agents, or anti-IL-12/23 agents, compared to placebo. (a) TNFi vs. Placebo; (b) Anti-IL-17 agents vs. Placebo; (c) Anti-IL-12/23 agents vs. Placebo. CI: confidence interval.

**Figure 2:** Forest plot of pooled data of biologic agents comparing to each other on serious infections. No significant difference in the risk of serious infection among different biologic agents was detected. (a) Anti-interleukin (IL)-17 agents vs. tumor necrosis factor inhibitors (TNFi); (b) Anti-IL-17 agents vs. Anti-IL-12/23 agents; (c) Anti-IL-12/23 agents vs. TNFi. CI: confidence interval.

**Table 3:** Risk of bias assessment for randomize controlled trials (RCTs). The risk of bias of the articles included was assessed by two independent investigators using the Cochrane collaboration tool. IL: interleukin.

**Table 4:** Quality of evidence on *Candida* infections using Grades of Recommendations Assessment, Development and Evaluation (GRADE). (a) Anti-interleukin (IL)-17 agents vs. Placebo; (b) Anti-IL-17 agents vs. Anti-IL-12/23 agents; (c) Anti-IL-17 agents vs. tumor necrosis factor inhibitors (TNFi). OR: odds ratio.

**Table 5:** Quality of evidence on serious infections using Grades of Recommendations Assessment, Development and Evaluation (GRADE). (a) Biologics vs. Placebo; (b) tumor necrosis factor inhibitors (TNFi) vs. Placebo; (c) Anti-interleukin (IL)-17 agents vs. Placebo; (d) Anti-IL-12/23 agents vs. Placebo; (e) Anti-IL-17 agents vs. TNFi; (f) Anti-IL-17 agents vs. Anti-IL-12/23 agents; (g) Anti-IL-12/23 agents vs. TNFi. OR: odds ratio.

## Supplementary files

**Table 1:** Full search strategy. RCT: randomize controlled trials; IL: interleukin; TNFi: tumor necrosis factor inhibitors.

### PubMed (31-12-2021)

**Limit:** Randomized Controlled Trial only

| Concepts                             | #        | Search strategy                                                                                                                                                                                                                                                                                                                                                                                                                                                                                                                                                                                                                                                                                                                                                                                                                                                                                                                                                                                                                                                                                                                                                                                                                                                                                                               | Results    |
|--------------------------------------|----------|-------------------------------------------------------------------------------------------------------------------------------------------------------------------------------------------------------------------------------------------------------------------------------------------------------------------------------------------------------------------------------------------------------------------------------------------------------------------------------------------------------------------------------------------------------------------------------------------------------------------------------------------------------------------------------------------------------------------------------------------------------------------------------------------------------------------------------------------------------------------------------------------------------------------------------------------------------------------------------------------------------------------------------------------------------------------------------------------------------------------------------------------------------------------------------------------------------------------------------------------------------------------------------------------------------------------------------|------------|
| <b>Psoriasis</b>                     | <b>1</b> | ((psoriasis[Title/Abstract] OR (Psoriasis[Title/Abstract] OR (Pustulosis of Palms and Soles[Title/Abstract] OR (Pustulosis Palmaris et Plantaris[Title/Abstract] OR (Palmoplantaris Pustulosis[Title/Abstract] OR (Pustular&nbsp;Psoriasis&nbsp;of Palms and Soles[Title/Abstract])))                                                                                                                                                                                                                                                                                                                                                                                                                                                                                                                                                                                                                                                                                                                                                                                                                                                                                                                                                                                                                                         |            |
| <b>TNFi combined</b>                 | <b>2</b> | ((((infliximab[Title/Abstract] OR (Monoclonal Antibody cA2[Title/Abstract] OR (cA2, Monoclonal Antibody[Title/Abstract] OR (MAB cA2[Title/Abstract] OR (Infliximab-abda[Title/Abstract] OR (Renflexis[Title/Abstract] OR (Infliximab-dyyb[Title/Abstract] OR (Inflectra[Title/Abstract] OR (Remicade[Title/Abstract]))) OR ((etanercept[Title/Abstract] OR (TNFR-Fc Fusion Protein[Title/Abstract] OR (Fusion Protein, TNFR-Fc[Title/Abstract] OR (TNFR Fc Fusion Protein[Title/Abstract] OR (TNR 001[Title/Abstract] OR (TNT Receptor Fusion Protein[Title/Abstract] OR (TNTR-Fc[Title/Abstract] OR (TNR-001[Title/Abstract] OR (TNR001[Title/Abstract] OR (Etanercept-szss[Title/Abstract] OR (TNF Receptor Type II-IgG Fusion Protein[Title/Abstract] OR (TNF Receptor Type II IgG Fusion Protein[Title/Abstract] OR (Erelzi[Title/Abstract] OR (Recombinant Human Dimeric TNF Receptor Type II-IgG Fusion Protein[Title/Abstract] OR (Recombinant Human Dimeric TNF Receptor Type II IgG Fusion Protein[Title/Abstract] OR (Enbrel[Title/Abstract]))) OR ((adalimumab[Title/Abstract] OR (Humira[Title/Abstract] OR (Adalimumab-adbm[Title/Abstract] OR (Amjevita[Title/Abstract] OR (Adalimumab-atto[Title/Abstract] OR (Cyltezo[Title/Abstract] OR (D2E7 Antibody[Title/Abstract] OR (Antibody, D2E7[Title/Abstract]))) |            |
| <b>anti-IL-17 agents combined</b>    | <b>2</b> | ((((Secukinumab[Title/Abstract] OR (Cosentyx[Title/Abstract] OR (AIN 457[Title/Abstract] OR (AIN457[Title/Abstract] OR (AIN-457[Title/Abstract])) OR (Ixekizumab[Title/Abstract] OR (Taltz[Title/Abstract] OR (LY2439821[Title/Abstract] OR (LY-2439821[Title/Abstract])) OR ((Brodalumab[Title/Abstract] OR (Siliq[Title/Abstract] OR (KHK-4827[Title/Abstract] OR (KHK4827[Title/Abstract] OR (AMG-827[Title/Abstract] OR (AMG 827[Title/Abstract])))                                                                                                                                                                                                                                                                                                                                                                                                                                                                                                                                                                                                                                                                                                                                                                                                                                                                       |            |
| <b>anti-IL-12/23 agents combined</b> | <b>3</b> | ((((guselkumab[Title/Abstract] OR (Tremfya[Title/Abstract] OR (CNTO 1959[Title/Abstract] OR (CNTO-1959[Title/Abstract])) OR ((Ustekinumab[Title/Abstract] OR (Stelara[Title/Abstract] OR (CNTO 1275[Title/Abstract] OR (CNTO-1275[Title/Abstract])))                                                                                                                                                                                                                                                                                                                                                                                                                                                                                                                                                                                                                                                                                                                                                                                                                                                                                                                                                                                                                                                                          |            |
| <b>Total</b>                         | <b>4</b> | #1 AND (#2 OR #3 OR #4)                                                                                                                                                                                                                                                                                                                                                                                                                                                                                                                                                                                                                                                                                                                                                                                                                                                                                                                                                                                                                                                                                                                                                                                                                                                                                                       | <b>473</b> |

**Embase.com (31-12-2021)**

**Limit:** Randomized Controlled Trial only

| Concepts                  |            | #                   | Search strategy                               | Results                                                                                                             |  |
|---------------------------|------------|---------------------|-----------------------------------------------|---------------------------------------------------------------------------------------------------------------------|--|
| psoriasis                 |            | 1                   | 'psoriasis':ab,ti                             |                                                                                                                     |  |
|                           |            | 2                   | 'psoriasis':ab,ti                             |                                                                                                                     |  |
|                           |            | 3                   | 'pustulosis of Palms and Soles':ab,ti         |                                                                                                                     |  |
|                           |            | 4                   | 'pustulosis Palmaris et Plantaris':ab,ti      |                                                                                                                     |  |
|                           |            | 5                   | 'Palmoplantaris Pustulosis':ab,ti             |                                                                                                                     |  |
|                           |            | 6                   | 'pustular Psoriasis of Palms and Soles':ab,ti |                                                                                                                     |  |
| <b>Psoriasis combined</b> |            | 7                   | <b>#1 OR #2 OR #3 OR #4 OR #5 OR #6</b>       |                                                                                                                     |  |
| TNFi                      | infliximab | 8                   | 'Infliximab':ab,ti                            |                                                                                                                     |  |
|                           |            | 9                   | 'Monoclonal Antibody cA2':ab,ti               |                                                                                                                     |  |
|                           |            | 10                  | 'cA2, Monoclonal Antibody':ab,ti              |                                                                                                                     |  |
|                           |            | 11                  | 'MAb cA2':ab,ti                               |                                                                                                                     |  |
|                           |            | 12                  | 'Infliximab-abda':ab,ti                       |                                                                                                                     |  |
|                           |            | 13                  | 'Renflexis':ab,ti                             |                                                                                                                     |  |
|                           |            | 14                  | 'Infliximab-dyyb':ab,ti                       |                                                                                                                     |  |
|                           |            | 15                  | 'Inflextra':ab,ti                             |                                                                                                                     |  |
|                           |            | 16                  | 'Remicade':ab,ti                              |                                                                                                                     |  |
|                           |            | infiximab combined  | 17                                            | <b>#8 OR #9 OR #10 OR #11 OR #12 OR #13 OR #14 OR #15 OR #16</b>                                                    |  |
|                           |            | etanercept          | 18                                            | 'etanercept':ab,ti                                                                                                  |  |
|                           |            |                     | 19                                            | 'TNFR-Fc Fusion Protein':ab,ti                                                                                      |  |
|                           |            |                     | 20                                            | 'Fusion Protein, TNFR-Fc':ab,ti                                                                                     |  |
|                           |            |                     | 21                                            | 'TNFR Fc Fusion Protein':ab,ti                                                                                      |  |
|                           |            |                     | 22                                            | 'TNR 001':ab,ti                                                                                                     |  |
|                           |            |                     | 23                                            | 'TNT Receptor Fusion Protein':ab,ti                                                                                 |  |
|                           |            |                     | 24                                            | 'TNTR-Fc':ab,ti                                                                                                     |  |
|                           |            |                     | 25                                            | 'TNR-001':ab,ti                                                                                                     |  |
|                           |            |                     | 26                                            | 'TNR001':ab,ti                                                                                                      |  |
|                           |            |                     | 27                                            | 'Etanercept-szsz':ab,ti                                                                                             |  |
|                           |            |                     | 28                                            | 'TNF Receptor Type II-IgG Fusion Protein':ab,ti                                                                     |  |
|                           |            |                     | 29                                            | 'TNF Receptor Type II IgG Fusion Protein':ab,ti                                                                     |  |
|                           |            |                     | 30                                            | 'Erelzi':ab,ti                                                                                                      |  |
|                           |            |                     | 31                                            | 'Recombinant Human Dimeric TNF Receptor Type II-IgG Fusion Protein':ab,ti                                           |  |
|                           |            |                     | 32                                            | 'Recombinant Human Dimeric TNF Receptor Type II IgG Fusion Protein':ab,ti                                           |  |
|                           |            |                     | 33                                            | 'Enbrel':ab,ti                                                                                                      |  |
|                           |            | etanercept combined | 34                                            | <b>#18 OR #19 OR #20 OR #21 OR #22 OR #23 OR #24 OR #25 OR #26 OR #27 OR #28 OR #29 OR #30 OR #31 OR #32 OR #33</b> |  |

|                                      |                     |                      |                                                      |                                 |  |
|--------------------------------------|---------------------|----------------------|------------------------------------------------------|---------------------------------|--|
| TNFi                                 | adalimumab          | 35                   | 'Adalimumab':ab,ti                                   |                                 |  |
|                                      |                     | 36                   | 'Humira':ab,ti                                       |                                 |  |
|                                      |                     | 37                   | 'Adalimumab-adbm':ab,ti                              |                                 |  |
|                                      |                     | 38                   | 'Amjevita':ab,ti                                     |                                 |  |
|                                      |                     | 39                   | 'Adalimumab-atto':ab,ti                              |                                 |  |
|                                      |                     | 40                   | 'Cyltezo':ab,ti                                      |                                 |  |
|                                      |                     | 41                   | 'D2E7 Antibody':ab,ti                                |                                 |  |
|                                      |                     | 42                   | 'Antibody, D2E7':ab,ti                               |                                 |  |
|                                      | adalimumab combined | 43                   | #35 OR #36 OR #37 OR #38 OR #39 OR #40 OR #41 OR #42 |                                 |  |
| <b>TNFi combined</b>                 |                     | <b>44</b>            | <b>#17 OR #34 OR #43</b>                             |                                 |  |
| anti-IL-17 agents                    | Secukinumab         | 45                   | 'Secukinumab':ab,ti                                  |                                 |  |
|                                      |                     | 46                   | 'Cosentyx':ab,ti                                     |                                 |  |
|                                      |                     | 47                   | 'AIN 457':ab,ti                                      |                                 |  |
|                                      |                     | 48                   | 'AIN457':ab,ti                                       |                                 |  |
|                                      |                     | 49                   | 'AIN-457':ab,ti                                      |                                 |  |
|                                      |                     | Secukinumab combined | 50                                                   | #45 OR #46 OR #47 OR #48 OR #49 |  |
|                                      | Ixekizumab          | 51                   | 'Ixekizumab':ab,ti                                   |                                 |  |
|                                      |                     | 52                   | 'Taltz':ab,ti                                        |                                 |  |
|                                      |                     | 53                   | 'LY2439821':ab,ti                                    |                                 |  |
|                                      |                     | 54                   | 'LY-2439821':ab,ti                                   |                                 |  |
|                                      |                     | Ixekizumab combined  | 55                                                   | #51 OR #52 OR #53 OR #54        |  |
|                                      | Brodalumab          | 56                   | 'Brodalumab':ab,ti                                   |                                 |  |
|                                      |                     | 57                   | 'Siliq':ab,ti                                        |                                 |  |
|                                      |                     | 58                   | 'KHK-4827':ab,ti                                     |                                 |  |
|                                      |                     | 59                   | 'KHK4827':ab,ti                                      |                                 |  |
|                                      |                     | 60                   | 'AMG-827':ab,ti                                      |                                 |  |
| 61                                   |                     | 'AMG 827':ab,ti      |                                                      |                                 |  |
|                                      | Brodalumab combined | 62                   | #56 OR #57 OR #58 OR #59 OR #60 OR #61               |                                 |  |
| <b>anti-IL-17 agents combined</b>    |                     | <b>63</b>            | <b>#50 OR #55 OR #62</b>                             |                                 |  |
| anti-IL-12/23 agents                 | Ustekinumab         | 64                   | 'Ustekinumab':ab,ti                                  |                                 |  |
|                                      |                     | 65                   | 'Stelara':ab,ti                                      |                                 |  |
|                                      |                     | 66                   | 'CNTO 1275':ab,ti                                    |                                 |  |
|                                      |                     | 67                   | 'CNTO-1275':ab,ti                                    |                                 |  |
|                                      |                     | Ustekinumab combined | 68                                                   | #64 OR #65 OR #66 OR #67        |  |
|                                      | guselkumab          | 69                   | 'guselkumab ':ab,ti                                  |                                 |  |
|                                      |                     | 70                   | 'tremfya':ab,ti                                      |                                 |  |
|                                      |                     | 71                   | 'CNTO 1959':ab,ti                                    |                                 |  |
| 72                                   |                     | 'CNTO-1959 ':ab,ti   |                                                      |                                 |  |
|                                      | guselkumab combined | 73                   | #69 OR #70 OR #71 OR #72                             |                                 |  |
| <b>anti-IL-12/23 agents combined</b> |                     | <b>74</b>            | <b>#68 OR #73</b>                                    |                                 |  |
| <b>Total</b>                         |                     | <b>75</b>            | <b>#7 AND (#44 OR #63 OR #74)</b>                    | <b>1185</b>                     |  |

Cochrane Library(31-12-2021)

Limit: trials only

| Concepts                  |            | #                   | Search strategy                               | Results                                                                                                      |  |
|---------------------------|------------|---------------------|-----------------------------------------------|--------------------------------------------------------------------------------------------------------------|--|
| psoriasis                 |            | 1                   | (psoriasis):ab,ti                             |                                                                                                              |  |
|                           |            | 2                   | (psoriasis):ab,ti                             |                                                                                                              |  |
|                           |            | 3                   | (pustulosis of Palms and Soles):ab,ti         |                                                                                                              |  |
|                           |            | 4                   | (pustulosis Palmaris et Plantaris):ab,ti      |                                                                                                              |  |
|                           |            | 5                   | (Palmoplantaris Pustulosis):ab,ti             |                                                                                                              |  |
|                           |            | 6                   | (pustular Psoriasis of Palms and Soles):ab,ti |                                                                                                              |  |
| <b>Psoriasis combined</b> |            | <b>7</b>            | <b>#1 OR #2 OR #3 OR #4 OR #5 OR #6</b>       | <b>8575</b>                                                                                                  |  |
| TNFi                      | infliximab | 8                   | (Infliximab):ab,ti                            |                                                                                                              |  |
|                           |            | 9                   | (Monoclonal Antibody cA2):ab,ti               |                                                                                                              |  |
|                           |            | 10                  | (cA2, Monoclonal Antibody):ab,ti              |                                                                                                              |  |
|                           |            | 11                  | (MAb cA2):ab,ti                               |                                                                                                              |  |
|                           |            | 12                  | (Infliximab-abda):ab,ti                       |                                                                                                              |  |
|                           |            | 13                  | (Renflexis):ab,ti                             |                                                                                                              |  |
|                           |            | 14                  | (Infliximab-dyyb):ab,ti                       |                                                                                                              |  |
|                           |            | 15                  | (Inflextra):ab,ti                             |                                                                                                              |  |
|                           |            | 16                  | (Remicade):ab,ti                              |                                                                                                              |  |
|                           |            | infiximab combined  | 17                                            | #8 OR #9 OR #10 OR #11 OR #12 OR #13 OR #14 OR #15 OR #16                                                    |  |
|                           |            | etanercept          | 18                                            | (etanercept):ab,ti                                                                                           |  |
|                           |            |                     | 19                                            | (TNFR-Fc Fusion Protein):ab,ti                                                                               |  |
|                           |            |                     | 20                                            | (Fusion Protein, TNFR-Fc):ab,ti                                                                              |  |
|                           |            |                     | 21                                            | (TNFR Fc Fusion Protein):ab,ti                                                                               |  |
|                           |            |                     | 22                                            | (TNR 001):ab,ti                                                                                              |  |
|                           |            |                     | 23                                            | (TNT Receptor Fusion Protein):ab,ti                                                                          |  |
|                           |            |                     | 24                                            | (TNTR-Fc):ab,ti                                                                                              |  |
|                           |            |                     | 25                                            | (TNR-001):ab,ti                                                                                              |  |
|                           |            |                     | 26                                            | (TNR001):ab,ti                                                                                               |  |
|                           |            |                     | 27                                            | (Etanercept-szsz):ab,ti                                                                                      |  |
|                           |            |                     | 28                                            | (TNF Receptor Type II-IgG Fusion Protein):ab,ti                                                              |  |
|                           |            |                     | 29                                            | (TNF Receptor Type II IgG Fusion Protein):ab,ti                                                              |  |
|                           |            |                     | 30                                            | (Erelzi):ab,ti                                                                                               |  |
|                           |            |                     | 31                                            | (Recombinant Human Dimeric TNF Receptor Type II-IgG Fusion Protein):ab,ti                                    |  |
|                           |            |                     | 32                                            | (Recombinant Human Dimeric TNF Receptor Type II IgG Fusion Protein):ab,ti                                    |  |
|                           |            |                     | 33                                            | (Enbrel):ab,ti                                                                                               |  |
|                           |            | etanercept combined | 34                                            | #18 OR #19 OR #20 OR #21 OR #22 OR #23 OR #24 OR #25 OR #26 OR #27 OR #28 OR #29 OR #30 OR #31 OR #32 OR #33 |  |

|                                      |                     |                        |                                                      |                                 |  |
|--------------------------------------|---------------------|------------------------|------------------------------------------------------|---------------------------------|--|
| TNFi                                 | adalimumab          | 35                     | (Adalimumab):ab,ti                                   |                                 |  |
|                                      |                     | 36                     | (Humira):ab,ti                                       |                                 |  |
|                                      |                     | 37                     | (Adalimumab-adbm):ab,ti                              |                                 |  |
|                                      |                     | 38                     | (Amjevita):ab,ti                                     |                                 |  |
|                                      |                     | 39                     | (Adalimumab-atto):ab,ti                              |                                 |  |
|                                      |                     | 40                     | (Cyltezo):ab,ti                                      |                                 |  |
|                                      |                     | 41                     | (D2E7 Antibody):ab,ti                                |                                 |  |
|                                      | 42                  | (Antibody, D2E7):ab,ti |                                                      |                                 |  |
|                                      | adalimumab combined | 43                     | #35 OR #36 OR #37 OR #38 OR #39 OR #40 OR #41 OR #42 |                                 |  |
| <b>TNFi combined</b>                 |                     | <b>44</b>              | <b>#17 OR #34 OR #43</b>                             | <b>6946</b>                     |  |
| anti-IL-17 agents                    | Secukinumab         | 45                     | (Secukinumab):ab,ti                                  |                                 |  |
|                                      |                     | 46                     | (Cosentyx):ab,ti                                     |                                 |  |
|                                      |                     | 47                     | (AIN 457):ab,ti                                      |                                 |  |
|                                      |                     | 48                     | (AIN457):ab,ti                                       |                                 |  |
|                                      |                     | 49                     | (AIN-457):ab,ti                                      |                                 |  |
|                                      |                     | Secukinumab combined   | 50                                                   | #45 OR #46 OR #47 OR #48 OR #49 |  |
|                                      | Ixekizumab          | 51                     | (Ixekizumab):ab,ti                                   |                                 |  |
|                                      |                     | 52                     | (Taltz):ab,ti                                        |                                 |  |
|                                      |                     | 53                     | (LY2439821):ab,ti                                    |                                 |  |
|                                      |                     | 54                     | (LY-2439821):ab,ti                                   |                                 |  |
|                                      |                     | Ixekizumab combined    | 55                                                   | #51 OR #52 OR #53 OR #54        |  |
|                                      | Brodalumab          | 56                     | (Brodalumab):ab,ti                                   |                                 |  |
|                                      |                     | 57                     | (Siliq):ab,ti                                        |                                 |  |
|                                      |                     | 58                     | (KHK-4827):ab,ti                                     |                                 |  |
| 59                                   |                     | (KHK4827):ab,ti        |                                                      |                                 |  |
| 60                                   |                     | (AMG-827):ab,ti        |                                                      |                                 |  |
| 61                                   |                     | (AMG 827):ab,ti        |                                                      |                                 |  |
|                                      | Brodalumab combined | 62                     | #56 OR #57 OR #58 OR #59 OR #60 OR #61               |                                 |  |
| <b>anti-IL-17 agents combined</b>    |                     | <b>63</b>              | <b>#50 OR #55 OR #62</b>                             | <b>1711</b>                     |  |
| anti-IL-12/23 agents                 | Ustekinumab         | 64                     | (Ustekinumab):ab,ti                                  |                                 |  |
|                                      |                     | 65                     | (Stelara):ab,ti                                      |                                 |  |
|                                      |                     | 66                     | (CNTO 1275):ab,ti                                    |                                 |  |
|                                      |                     | 67                     | (CNTO-1275):ab,ti                                    |                                 |  |
|                                      |                     | Ustekinumab combined   | 68                                                   | #64 OR #65 OR #66 OR #67        |  |
|                                      | guselkumab          | 69                     | (guselkumab ):ab,ti                                  |                                 |  |
|                                      |                     | 70                     | (tremfya):ab,ti                                      |                                 |  |
|                                      |                     | 71                     | (CNTO 1959):ab,ti                                    |                                 |  |
|                                      |                     | 72                     | (CNTO-1959 ):ab,ti                                   |                                 |  |
|                                      | guselkumab combined | 73                     | #69 OR #70 OR #71 OR #72                             |                                 |  |
| <b>anti-IL-12/23 agents combined</b> |                     | <b>74</b>              | <b>#68 OR #73</b>                                    | <b>1284</b>                     |  |

|                     |           |                                           |            |
|---------------------|-----------|-------------------------------------------|------------|
| RCT                 | 75        | (Randomized Controlled Trial):pt          |            |
|                     | 76        | (Equivalence Trial):pt                    |            |
|                     | 77        | (Pragmatic Clinical Trial):pt             |            |
| <b>RCT combined</b> | <b>78</b> | <b>#75 OR #76 OR #77</b>                  |            |
| <b>Total</b>        | <b>75</b> | <b>(#44 OR #63 OR #74) AND #7 AND #78</b> | <b>490</b> |



**Table 2.** Characteristics of randomized controlled trials (RCTs) included in the analysis.

| study                          | the registration name or number | No. of study sites and countries | Randomized controlled-phase (weeks) | Interventions of treatment group                         | No. of participants receiving treatment | Mean age ± SD (median) years                                               | Proportion of patients with psoriatic arthritis (%)     | Mean Psoriasis Area and Severity Index Score ± SD (median)                | Criteria for the moderate-to-severe psoriasis <sup>1</sup>    | whether the recent history of serious infection was excluded |
|--------------------------------|---------------------------------|----------------------------------|-------------------------------------|----------------------------------------------------------|-----------------------------------------|----------------------------------------------------------------------------|---------------------------------------------------------|---------------------------------------------------------------------------|---------------------------------------------------------------|--------------------------------------------------------------|
| <b>Secukinumab vs. Placebo</b> |                                 |                                  |                                     |                                                          |                                         |                                                                            |                                                         |                                                                           |                                                               |                                                              |
| Rich et.al.,2013               | (NCT00941031)                   | 60 sites (2009.07-2010.12)       | 12w                                 | 150mg-single(0w); monthly(0w,4w,8w) ; early(0w,1w,2w,4w) | single:66; monthly:138; early:133       | single:42.7±11.32; monthly:44.2±12.96; early:44.5 ± 12.45; PBO 44.2 ±12.59 | single:22.7; monthly:32.6; early:29.3; PBO:17.9         | single:19.9±6.73; monthly:20.8±8.08; early:19.9 ± 7.81; PBO:20.5 ± 9.31   | BSA≥10% and IGA≥3 and PASI≥12                                 | yes                                                          |
| Langley et.al.,2014            | ERASURE (NCT01365455)           | 231 sites (2011.06-2013.06)      | 12w                                 | 150mg;300mg. (1w, 2w, 3w, 4w,q4w)                        | 150mg: 245; 300mg:245                   | 150mg: 44.9±13.3; 300mg:44.9±13.5; PBO 45.4±12.6                           | 150mg: 18.8; 300mg:23.3; PBO 27.4                       | 150mg: 22.3±9.8; 300mg:22.5±9.2; PBO 21.4±9.1                             | BSA≥10% and IGA≥3 and PASI≥12                                 | yes(within 2 weeks)                                          |
| Langley et.al.,2014            | FIXTURE (NCT01358578)           | 231 sites (2011.06-2013.06)      | 12w                                 | 150mg;300mg. (1w, 2w, 3w, 4w,q4w)                        | 150mg: 327; 300mg:326                   | 150mg: 45.4±12.9; 300mg:44.5±13.2; PBO 44.1±12.6                           | 150mg: 15.0; 300mg:15.3; PBO 15.0                       | 150mg: 23.7±10.5; 300mg:23.9±9.9; PBO 24.1±10.5                           | BSA≥10% and IGA≥3 and PASI≥12                                 | yes(within 2 weeks)                                          |
| Paul et.al.,2015               | JUNCTURE (NCT01636687)          | 38 sites (2012.10-2013.04)       | 12w                                 | 150mg;300mg. (0w, 1w, 2w, 3w,q4w)                        | 150mg: 61; 300mg:60                     | 150mg: 43.9±14.41; 300mg:46.6±14.23; PBO 43.7±12.74                        | 150mg: 26.2; 300mg:23.3; PBO 19.7                       | 150mg: 22.0±8.85; 300mg:18.9±6.37; PBO 19.4±6.70                          | BSA≥10% and IGA≥3 and PASI≥12                                 | not reported                                                 |
| Gottlieb et.al.,2016           | FEATURE (NCT01555125)           | 32 site (2012.05-2013.10)        | 12w                                 | 150mg;300mg. (0w, 1w, 2w, 3w,q4w)                        | 150mg: 59; 300mg:59                     | 150mg: 46.0±15.09; 300mg:45.1±12.57; PBO 46.5±14.14                        | not reported                                            | 150mg: 21.4±9.1; 300mg:20.7±7.95; PBO 21.1±8.49                           | BSA≥10% and IGA≥3 and PASI≥12                                 | yes(within 2 weeks)                                          |
| Bagel et.al.,2017              | SCALP (NCT02267135)             | 17 sites (2014.09-2015.12)       | 12w                                 | 300 mg (1w, 2w, 3w, q4w)                                 | 51                                      | SEC:42.7 ±13.4; PBO:41.1 ±14.2                                             | not reported                                            | SEC:8.4 ±7.6; PBO:10.1 ±7.8                                               | PSSI≥12, with ≥30% of the scalp surface area affected, IGA1≥3 | no                                                           |
| von Stebut et.al.,2019         | CARIMA (NCT02559622)            | 23 sites (2014.04-2016.04)       | 12w                                 | 150mg;300mg. (1w, 2w, 3w, 4w,q4w)                        | 150mg: 54; 300mg:48                     | 150mg: 46.0±14.4; 300mg:44.2±12.9; PBO 45.2±12.2                           | 150mg: 27.8; 300mg:25.0; PBO 16.3                       | 150mg: 21.7±10.5; 300mg:19.3±7.9; PBO 18.4±5.2                            | PASI≥ 10                                                      | yes                                                          |
| <b>Ixekizumab vs. Placebo</b>  |                                 |                                  |                                     |                                                          |                                         |                                                                            |                                                         |                                                                           |                                                               |                                                              |
| Leonardi et.al.,2012           | (NCT01107457)                   | (2010.04-2011.03)                | 20w                                 | 10 mg;25mg;75 mg; 150 mg (0w, 2w, 4w, q4w)               | 10 mg:28; 25 mg:30; 75mg:29; 150 mg:28  | 10 mg:48±11; 25 mg:46±15; 75mg:46±13; 150mg:46±13; PBO:45±13               | 10 mg:25.0; 25 mg:36.7; 75mg:27.6; 150mg:28.6; PBO:14.8 | 10mg:19.2±8.0; 25mg:18.6±4.9; 75mg:17.2±4.3; 150mg:17.7±6.2; PBO:16.5±5.3 | BSA≥10% and PGA≥3 and PASI≥12                                 | yes(recent)                                                  |
| Gordon et.al.,2016             | UNCOVER-1 (NCT01474512)         | /                                | 12w                                 | 160 mg(0w)-80 mg(eow or q4w)                             | eow:433; q4w:432                        | eow:45.0±12.0; q4w:46.0±13.0; PBO 46.0±13.0                                | not reported                                            | eow:20.0±8.0; q4w:20.0±7.0; PBO 20.0±9.0                                  | BSA≥10% and PGA≥3 and PASI≥12                                 | yes                                                          |

|                               |                         |                              |     |                                                   |                              |                                                                          |                                              |                                                                              |                                |                    |
|-------------------------------|-------------------------|------------------------------|-----|---------------------------------------------------|------------------------------|--------------------------------------------------------------------------|----------------------------------------------|------------------------------------------------------------------------------|--------------------------------|--------------------|
| Gordon et.al.,2016            | UNCOVER-2 (NCT01597245) | (2012.05-2013.12)            | 12w | 160 mg(0w)-80 mg(eow or q4w)                      | eow:351; q4w:347             | eow:45.0±13.0; q4w:45.0±14.0; PBO 45.0±12.0                              | not reported                                 | eow:19.0±7.0; q4w:20.0±7.0; PBO 21.0±8.0                                     | BSA≥10% and PGA≥3 and PASI≥12  | yes                |
| Gordon et.al.,2016            | UNCOVER-3 (NCT01646177) | (2012.08-2014.02)            | 12w | 160 mg(0w)-80 mg(eow or q4w)                      | eow:385; q4w:386             | eow:46.0±13.0; q4w:46±13.0; PBO 46±12.0                                  | not reported                                 | eow:21±8.0; q4w:21±8.0; PBO 21±8.0                                           | BSA≥10% and PGA≥3 and PASI≥12  | yes                |
| Ryan et.al.,2018              | IXORA-Q (NCT02718898)   | 34 sites (2016.05-2016.12)   | 12w | 160mg(0w) – 80 mg(eow)                            | 75                           | IXE:43.1±13.0; PBO:44.4 ±12.6                                            | not reported                                 | IXE:26.3±15.4; PBO:28.3±14.4                                                 | sPGA-G ≥ 3 and sPGA ≥ 3        | yes(12w)           |
| <b>Brodalumab vs. Placebo</b> |                         |                              |     |                                                   |                              |                                                                          |                                              |                                                                              |                                |                    |
| Papp et.al.,2012              | (NCT00975637)           | 23 sites (2009.12-2010.04)   | 12w | 70mg;140mg;210mg (0w,1w, 2w,eow) ; 280 mg(0w,q4w) | 160                          | BRO:42.6±11.7; PBO:41.8±14.4                                             | BRO:24.0; PBO:18.0                           | BRO:19.2±6.8; PBO:18.9±5.9                                                   | BSA≥10% and PASI≥12            | yes(recent)        |
| Lebwohl et.al.,2015           | AMAGINE-2 (NCT01708603) | 142 sites (2012.08-2014.09)  | 12w | 140 mg;210 mg (0w,1w, 2w,eow)                     | 140mg: 610; 210mg:612        | 140mg:45.0±13.0; 210mg:45.0±13.0; PBO 44.0±13.0                          | 140mg: 21.0; 210mg:19.0 PBO 17.0             | 140mg:20.5±8.2; 210mg:20.3±8.3 PBO 20.4±8.2                                  | BSA≥10% and sPGA≥3 and PASI≥12 | not reported       |
| Lebwohl et.al.,2015           | AMAGINE-3 (NCT01708629) | 142 sites (2012.09-2014.08)  | 12w | 140mg;210mg (0w,1w, 2w,eow)                       | 140mg: 629; 210mg:624        | 140mg: 45.0±13.0; 210mg:45.0±13.0; PBO 44.0±13.0                         | 140mg: 21.0; 210mg:20.0 PBO 19.0             | 140mg:20.1±8.5; 210mg:20.4±8.3 PBO 20.1±8.7                                  | BSA≥10% and sPGA≥3 and PASI≥12 | not reported       |
| Nakagawa et.al.,2016          | (NCT01748539)           | multicenter                  | 12w | 70mg;140mg;210mg (0w,1w, 2w,eow)                  | 70mg:39; 140mg: 37; 210mg:37 | 70mg:43.4±11.8; 140mg:46.4±13.2; 210mg:46.4±11.8; PBO 46.6±10.8          | 70mg:15.4; 140mg: 16.2; 210mg:13.5; PBO 18.4 | 70mg:27.58±11.61; 140mg:28.53±10.77; 210mg:27.98±14.35; PBO 23.97±8.90       | BSA≥10% and PASI≥12            | yes(recent)        |
| Papp et.al.,2016              | AMAGINE-1 (NCT01708590) | 73 centres (2012.08-2014.03) | 12w | 140 mg;210mg (0w,1w,2w,eow)                       | 140mg: 219; 210mg:222        | 140mg:46.0±13.0; 210mg:46.0±12.0; PBO 47.0±13.0                          | 140mg: 27.0; 210mg:26.0; PBO 29.0            | 140mg:20.0±7.4; 210mg:19.4±6.6 PBO 19.7±7.7                                  | BSA≥10% and sPGA≥3 and PASI≥12 | yes(within 8weeks) |
| <b>Adalimumab vs. Placebo</b> |                         |                              |     |                                                   |                              |                                                                          |                                              |                                                                              |                                |                    |
| Gordon et.al.,2006            | /                       | 18 sites                     | 12w | 80mg(0w)-40mg(eow); 80mg(0w,1w)-40mg(weekly)      | eow 45; weekly 50            | eow 46; weekly 44; PBO 43                                                | eow 33; weekly 24; PBO 31                    | eow 16.7; weekly 14.5; PBO 16                                                | BSA≥5%                         | no                 |
| Saurat et.al.,2008            | CHAMPION (NCT00235820)  | 28 sites                     | 16w | 80mg(0w)-40mg(eow)                                | 108                          | ADA 42.9± 12.6 PBO 40.7± 11.4                                            | ADA 21.3; PBO 20.8                           | ADA 20.2± 7.5; PBO 19.2± 6.9                                                 | BSA≥10% and PASI≥10            | not reported       |
| Menter et.al.,2008            | REVEAL (NCT00237887)    | 81 sites                     | 16w | 80mg(0w)-40mg(eow)                                | 814                          | ADA 44.1± 13.2 PBO 45.4± 13.4                                            | ADA 27.5 PBO 28.4                            | ADA 19.0± 7.08 PBO 18.8± 7.09                                                | BSA≥10% and PASI≥12 and PGA ≥3 | not reported       |
| Asahina et.al.,2010           | /                       | 42 sites (2005.09-2006.12)   | 24w | 40 mg(eow); 80mg(0w)-40mg(eow); 80 mg(eow)        | 123                          | 40mg(47.8±12.8); 80-40mg (44.2±14.32); 80mg(43.5±12.40); PBO(43.9±10.75) | not reported                                 | 40mg(25.44±8.98); 80-40mg (30.24±10.95); 80mg(28.27±11.03); PBO(29.10±11.77) | BSA≥10% and PASI≥12            | not reported       |

|                               |                        |                             |     |                                                                                              |                      |                                                          |                                  |                                                                    |                                                                                                                                                                   |                      |
|-------------------------------|------------------------|-----------------------------|-----|----------------------------------------------------------------------------------------------|----------------------|----------------------------------------------------------|----------------------------------|--------------------------------------------------------------------|-------------------------------------------------------------------------------------------------------------------------------------------------------------------|----------------------|
| Gordon et.al.,2015            | X-PLORE (NCT01483599)  | 43 sites (2011.10-2013.08)  | 16w | 80mg(0w)-40mg(eow)                                                                           | 43                   | ADA 50.0<br>PBO 46.5                                     | ADA 25.6<br>PBO 28.6             | ADA 20.2± 7.58<br>PBO 21.8± 9.98                                   | BSA≥10% and<br>PGA≥3 and<br>PASI≥12                                                                                                                               | not reported         |
| Blauvelt et.al.,2017          | VOYAGE 1 (NCT02207231) | 101 sites (2014.12-2016.04) | 16w | 80mg(0w)-40mg(eow)                                                                           | 333                  | ADA 42.9±12.58<br>PBO 44.9±12.90                         | ADA 18.6<br>PBO 17.2             | ADA 22.4±8.97<br>PBO 20.4±8.74                                     | BSA≥10% and<br>IGA≥3 and<br>PASI≥12                                                                                                                               | not reported         |
| Reich et.al.,2017             | VOYAGE 2 (NCT02207244) | 115 sites (2014.11-2016.05) | 16w | 80mg(0w)-40mg(eow)                                                                           | 248                  | ADA 43.2±11.9<br>PBO 43.3±12.4                           | ADA 17.7<br>PBO 18.5             | ADA 21.7±9.0<br>PBO 21.5 ±8.0                                      | BSA≥10% and<br>IGA≥3 and<br>PASI≥12                                                                                                                               | not reported         |
| Cai et.al.,2017               | (NCT01646073)          | 16 sites (2012.08-2013.12)  | 12w | 80mg(0w)-41mg(eow)                                                                           | 338                  | ADA 43.1±11.91<br>PBO 43.8±12.45                         | ADA 12.7<br>PBO 11.5             | ADA 28.2±12.0<br>PBO 25.6±10.98                                    | BSA≥10% and<br>PGA≥3 and<br>PASI≥10                                                                                                                               | not reported         |
| Elewski et.al.,2018           | (NCT02016482)          | 32 sites                    | 16w | 80mg(0w)-40mg(eow)                                                                           | 109                  | ADA 47.2±11.86<br>PBO 46.2±12.13                         | ADA 27.5<br>PBO 29.6             | ADA 12.3±8.59<br>PBO 12.8±9.43                                     | BSA≥10% or<br>BSA≥5% with a<br>total mNAPSI≥20<br>and target<br>fingernail<br>mNAPSI≥8, PGA-<br>F and PGA-S at<br>least moderate<br>severity, NPPFS≥3<br>or NRS≥3 | not reported         |
| <b>Infliximab vs. Placebo</b> |                        |                             |     |                                                                                              |                      |                                                          |                                  |                                                                    |                                                                                                                                                                   |                      |
| Gottlieb et.al.,2004          | SPIRIT                 | 24 sites (2001-2003)        | 30w | 3 mg/kg;5 mg/kg<br>(0w,2w,6w)-additional 3<br>mg/kg;5 mg/kg<br>(at 26w according to<br>sPGA) | 197                  | INF 44.0(35,53)<br>PBO 45.0(30,52)                       | INF 31.3<br>PBO 33.3             | INF 19.0(15,27)<br>PBO 18.0(15,27)                                 | BSA≥10% and<br>PASI≥12                                                                                                                                            | yes(within 2 months) |
| Reich et.al.,2005             | EXPRESS                | 32 sites                    | 12w | 5 mg/kg<br>(0w, 2w, 6w and q8w)                                                              | 298                  | INF 42.6±11.7<br>PBO 43.8±12.6                           | INF 31.0<br>PBO 29.0             | INF 22.9±9.3<br>PBO 22.8±8.7                                       | BSA≥10% and<br>PASI≥12                                                                                                                                            | yes                  |
| YANG et.al.,2012              | /                      | 9 sites (2009.02-2010.02)   | 12w | 5 mg/kg<br>(0w, 2w, and 6w)                                                                  | 84                   | INF 39.4±12.3<br>PBO 40.1±11.1                           | not reported                     | INF 23.9±10.7<br>PBO 25.3±12.7                                     | BSA≥10% and<br>PASI≥12                                                                                                                                            | yes(within 2 months) |
| <b>Etanercept vs. Placebo</b> |                        |                             |     |                                                                                              |                      |                                                          |                                  |                                                                    |                                                                                                                                                                   |                      |
| Gottlieb et.al.,2003          | /                      | multicenter                 | 24w | 25mg(biw)                                                                                    | 57                   | ETN 48.2(25-72)<br>PBO 46.5(18-77)                       | ETN 28<br>PBO 35                 | ETN 17.8±1.1<br>PBO 19.5±1.3                                       | BSA≥10%                                                                                                                                                           | not reported         |
| Papp et.al.,2005              | /                      | 50 sites                    | 12w | 25mg(biw);<br>50 mg(biw)                                                                     | 25mg196;<br>50 mg194 | 25 mg 46(20-87);<br>50 mg 44.5 (21-80);<br>PBO 44(18-80) | 25 mg 26;<br>50 mg 28;<br>PBO 26 | 25 mg 16.9(4.0-51.2);<br>50 mg 16.1(7.0-57.3);<br>PBO 16(7.0-62.4) | BSA≥10% and<br>PASI≥10 at<br>screening                                                                                                                            | yes(within 1 months) |
| Tyring et.al.,2006            | (NCT00111449)          | 39 sites (2003.06-2004.01)  | 12w | 50mg(biw)                                                                                    | 312                  | ETN 45.8±12.8<br>PBO 45.6±12.1                           | ETN 35<br>PBO 33                 | ETN 18.3±7.6<br>PBO 18.1±7.4                                       | BSA≥10% and<br>PASI≥10 at<br>screening                                                                                                                            | not reported         |

|                                |                              |                                   |     |                                                |                       |                                                         |                                           |                                                              |                                        |                      |
|--------------------------------|------------------------------|-----------------------------------|-----|------------------------------------------------|-----------------------|---------------------------------------------------------|-------------------------------------------|--------------------------------------------------------------|----------------------------------------|----------------------|
| van de Kerkhof et.al.,2008     | /                            | (2006.06-2007.05)                 | 12w | 50 mg(qw)                                      | 96                    | ETN 45.9 ± 12.8<br>PBO 43.6 ± 12.6                      | ETN 15.6<br>PBO 10.9                      | ETN 21.4 ± 9.3<br>PBO 21.0 ± 8.7                             | BSA≥10% and<br>PASI≥10 at<br>screening | yes(within 1 months) |
| Gottlieb et.al.,2011           | (NCT00691964)                | 33 sites<br>(2008.06-2009.03)     | 12w | 50 mg(biw)                                     | 141                   | ETN 43.1 ± 12.5<br>PBO 44.0 ± 13.6                      | ETN 22.7<br>PBO 20.6                      | ETN 19.4 ± 8.0<br>PBO 18.5 ± 6.9                             | BSA≥10% and<br>PGA≥3 and<br>PASI≥12    | not reported         |
| Strober et.al.,2011            | (NCT00710580)                | 41 sites<br>(2008.07-2009.04)     | 12w | 50 mg(biw)                                     | 139                   | ETN 45.2 ± 14.8<br>PBO 45.0 ± 13.9                      | ETN 33.1<br>PBO 20.8                      | ETN 18.5 ± 6.0<br>PBO 18.3 ± 6.4                             | BSA≥10% and<br>PGA≥3 and<br>PASI≥12    | not reported         |
| Langley et.al.,2014            | FIXTURE<br>(NCT01358578)     | 231 sites<br>(2011.06-2013.06)    | 12w | 50 mg(biw)                                     | 323                   | ETN 43.8±13.0<br>PBO 44.1±12.6                          | ETN 13.5<br>PBO 15.0                      | ETN 23.2±9.8<br>PBO 24.1±10.5                                | BSA≥10% and<br>IGA≥3 and<br>PASI≥12    | yes(within 2 weeks)  |
| Griffiths et.al.,2015          | UNCOVER-2<br>(NCT01597245)   | (2012.05-2013.12)                 | 12w | 50 mg(biw)                                     | 358                   | ETN 45.0±13.0<br>PBO 45.0±12.0                          | not reported                              | ETN 19.0±7.0<br>PBO 21.0±8.0                                 | BSA≥10% and<br>PGA≥3 and<br>PASI≥12    | not reported         |
| Griffiths et.al.,2015          | UNCOVER-3<br>(NCT01646177)   | (2012.08-2014.02)                 | 12w | 50 mg(biw)                                     | 382                   | ETN 46.0±14.0<br>PBO 46.0±12.0                          | not reported                              | ETN 21±8.0<br>PBO 21±8.0                                     | BSA≥10% and<br>PGA≥3 and<br>PASI≥12    | not reported         |
| Bachelez et.al.,2015           | (NCT01241591)                | 122 sites                         | 12w | 50 mg(biw)                                     | 335                   | ETN 42.0(18.0-74.0)<br>PBO 46.0(21.0-81.0)              | ETN 21.0<br>PBO 24.0                      | ETN 19.4(12.0-63.6)<br>PBO 19.5(12.4-54.6)                   | BSA≥10% and<br>PGA≥3 and<br>PASI≥12    | yes(within 6 months) |
| Reich et.al.,2017              | LIBERATE<br>(NCT01690299)    | multicenter                       | 16w | 50 mg(qw)                                      | 83                    | ETN 47.0±14.1<br>PBO 43.4±14.9                          | not reported                              | ETN 20.3±7.9<br>PBO 19.4±6.8                                 | BSA≥10% and<br>PGA≥3 and<br>PASI≥12    | yes                  |
| Reich et.al.,2017              | reSURFACE 2<br>(NCT01729754) | 132sites<br>(2013.02-2015.09)     | 12w | 50 mg(biw)                                     | 313                   | ETN 45.8±14.0<br>PBO 46.4±12.2                          | A maximum of<br>30%                       | ETN 20.2±7.36<br>PBO 20.0±7.57                               | BSA≥10% and<br>PGA≥3 and<br>PASI≥12    | yes(within 2 months) |
| <b>Ustekinumab vs. Placebo</b> |                              |                                   |     |                                                |                       |                                                         |                                           |                                                              |                                        |                      |
| Leonardi et.al.,2008           | PHOENIX 1<br>(NCT00267969)   | 48 sites<br>(2005.12-2007.09)     | 12w | 45mg(0w,4w);<br>90mg(0w,4w)                    | 45mg:255;<br>90mg:255 | 45mg:44.8±12.5;<br>90mg:46.2±11.3;<br>placebo 44.8±11.3 | 45mg:29.0;<br>90mg: 36.7;<br>placebo 35.3 | 45mg:20.5±8.6;<br>90mg:19.7±7.6;<br>placebo 20.4±8.6         | BSA≥10% and<br>PASI≥12                 | yes(recent)          |
| Papp et.al.,2008               | PHOENIX 2<br>(NCT00307437)   | 70 sites<br>(2006.03-<br>2007.09) | 12w | 45mg(0w,4w);<br>90mg(0w,4w)                    | 45mg:409;<br>90mg:411 | 45mg:45.1±12.1;<br>90mg:46.6±12.1;<br>placebo 47.0±12.5 | 45mg:26.2;<br>90mg: 22.9;<br>placebo 25.6 | 45mg:19.4±6.8;<br>90mg: 20.1±7.5;<br>placebo 19.4±7.5        | BSA≥10% and<br>PASI≥12                 | yes(recent)          |
| Tsai et.al.,2011               | PEARL                        | (2008.12-2010.03)                 | 12w | 45 mg(0w,4w)                                   | 61                    | UST 40.9±12.7;<br>PBO 40.4±10.1                         | UST 16.4<br>PBO 11.7                      | UST 25.2±11.9<br>PBO 22.9±8.6                                | BSA≥10% and<br>PASI≥12                 | yes                  |
| Igarashi et.al.,2012           | /                            | 35 sites<br>(2008.03-2010.03)     | 12w | 45mg(0w,4w);<br>90mg(0w,4w)                    | 45mg:64;<br>90mg:62   | 45mg:45.0;<br>90mg:44.0;<br>placebo 49.0                | 45mg:9.4;<br>90mg:11.3;<br>placebo:3.1    | 45mg:30.1±12.9;<br>90mg: 28.7 ± 11.2;<br>placebo 30.3 ± 11.8 | BSA≥10% and<br>PASI≥12                 | yes                  |
| Zhu et.al.,2013                | LOTUS                        | 14sites<br>(2009.10-2011.07)      | 12w | 45 mg(0w,4w)                                   | 160                   | UST 40.1±12.4;<br>PBO 39.2 ±12.2                        | UST 8.8<br>PBO 8.6                        | UST 23.2±9.5<br>PBO 22.7±9.5                                 | BSA≥10% and<br>PASI≥12                 | not reported         |
| Lebwohl et.al.,2015            | AMAGINE-2<br>(NCT01708603)   | 142 sites<br>(2012.08-2014.09)    | 12w | 45mg(BW≤100kg) or<br>90mg(BW>100kg)<br>(0w,4w) | 300                   | UST 45.0±13.0;<br>PBO 44.0±13.0                         | UST 17.0<br>PBO 17.0                      | UST 20.0±8.4<br>PBO 20.4±8.2                                 | BSA≥10% and<br>sPGA≥3 and<br>PASI≥12   | not reported         |

|                                                                      |                         |                                  |     |                                                                              |     |                                                    |                                |                                                  |                                            |                                                                                                                                          |
|----------------------------------------------------------------------|-------------------------|----------------------------------|-----|------------------------------------------------------------------------------|-----|----------------------------------------------------|--------------------------------|--------------------------------------------------|--------------------------------------------|------------------------------------------------------------------------------------------------------------------------------------------|
| Lebwohl et.al.,2015                                                  | AMAGINE-3 (NCT01708629) | 142 sites (2012.09-2014.08)      | 12w | 45mg(BW≤100 kg) or 90mg(BW>100kg) (0w,4w)                                    | 313 | UST 45.0±13.0; PBO 44.0±13.0                       | UST 20.0 PBO 19.0              | UST 20.1±8.4 PBO 20.1±8.7                        | BSA≥10% and sPGA≥3 and PASI≥12             | not reported                                                                                                                             |
| Gordon et.al.,2018                                                   | UltIMMA-1 (NCT02684370) | 139sites                         | 16w | 45 mg(0w,4w)                                                                 | 100 | UST 46.5±13.4; PBO 49.3±13.6                       | UST 23.0 PBO 35.0              | UST 20.1±6.8 PBO 20.5±6.7                        | BSA≥10% and sPGA≥3 and PASI≥12             | not reported                                                                                                                             |
| Gordon et.al.,2018                                                   | UltIMMA-2 (NCT02684357) | 139sites                         | 16w | 45 mg(0w,4w)                                                                 | 99  | UST 48.6±14.8; PBO 46.3±13.3                       | UST 27.0 PBO 32.0              | UST 18.2±5.9 PBO 18.9±7.3                        | BSA≥10% and sPGA≥3 and PASI≥12             | not reported                                                                                                                             |
| Reich et.al.,2021                                                    | BE VIVID (NCT03370133)  | 11 countries                     | 16w | 45 mg or 90 mg (0w,4w,q12w)                                                  | 163 | UST 46.0±13.6/ PBO 49.7±13.6                       | not reported                   | UST 21.3±8.3 PBO 20.1±6.8                        | PASI score ≥ 12, BSA ≥ 10% , IGA score ≥ 3 | yes (had a current, or history of, opportunistic, recurrent, or chronic infection; or had active Crohn' s disease or ulcerative colitis) |
| <b>Guselkumab vs. Placebo</b>                                        |                         |                                  |     |                                                                              |     |                                                    |                                |                                                  |                                            |                                                                                                                                          |
| Gordon et.al.,2015                                                   | X-PLORE (NCT01483599)   | 43 sites (2011.10-2013.08)       | 16w | 5mg/50mg/200mg(0w,4w, 12w)/14mg/100mg(q8w)                                   | 207 | GUS 44.0 PBO 46.5                                  | GUS 25.0 PBO 28.6              | GUS 20.0± 8.05 PBO 21.8± 9.98                    | BSA≥10% and PGA≥3 and PASI≥12              | yes(recent)                                                                                                                              |
| Blauvelt et.al.,2017                                                 | VOYAGE 1 (NCT02207231)  | 101sites(2014.12-2016.04)        | 16w | 100mg(0w,4w,12w,q8w)                                                         | 329 | GUS 43.9±12.47 PBO 44.9±12.90                      | GUS 19.5 PBO 17.2              | GUS 22.1±9.49 PBO 20.4±8.74                      | BSA≥10% and IGA≥3 and PASI≥12              | yes(recent)                                                                                                                              |
| Reich et.al.,2017                                                    | VOYAGE 2 (NCT02207244)  | 115sites(2014.11-2016.05)        | 16w | 100mg(0w,4w,12w,q8w)                                                         | 494 | GUS 43.7±12.2 PBO 43.3±12.4                        | GUS 17.9 PBO 18.5              | GUS 21.9±8.8 PBO 21.5 ±8.0                       | BSA≥10% and IGA≥3 and PASI≥12              | yes                                                                                                                                      |
| <b>Biologic agents compared with each other(not mentioned above)</b> |                         |                                  |     |                                                                              |     |                                                    |                                |                                                  |                                            |                                                                                                                                          |
| Griffiths et.al.,2010                                                | (NCT00454584)           | 67 sites (2007.03.26-2009.01.15) | 12w | ENT 50 mg(biw) UST45 or 90mg(0w,4w)                                          | 347 | ETN45.7±13.4; UST45mg:45.1±12.6; UST90mg:44.8±12.3 | ETN 27.4; 45mg:29.7; 90mg:27.4 | ETN18.6±6.2; UST45mg:20.5±9.2; UST 90mg:19.9±8.4 | BSA≥10% and PGA≥3 and PASI≥12              | yes(recent)                                                                                                                              |
| Thaci et.al.,2015                                                    | CLEAR (NCT02074982)     | 134 sites (2014.02-2014.10)      | 16w | SEC 300mg (0w, 1w, 2w, 3w,q4w); UST 45mg(BW≤100kg) or 90mg(BW>100kg) (0w,4w) | 337 | SEC:45.2±13.96; UST:44.6±13.67                     | SEC:20.5; UST:15.9             | SEC:21.7 ±8.5; UST:21.5±8.07                     | BSA≥10% and IGA≥3 and PASI≥12              | yes(within 2 weeks)                                                                                                                      |

|                      |                       |                               |     |                                                                                                 |     |                                  |                |                                |                                               |                                          |
|----------------------|-----------------------|-------------------------------|-----|-------------------------------------------------------------------------------------------------|-----|----------------------------------|----------------|--------------------------------|-----------------------------------------------|------------------------------------------|
| Paul et.al.,2019     | IXORA-S (NCT02561806) | 51 sites (2015.10-2017.05)    | 52w | IXE 160mg(0w)-80 mg(eow)-80mg(q4w);<br>UST 45mg(BW≤100kg) or 90mg(BW>100kg) (0w,4w,16w,28w,40w) | 135 | IXE:42.7 ±12.7;<br>UST:44.0±13.3 | not reported   | IXE:19.9 ±8.2;<br>UST:19.8±9.0 | PASI score ≥10                                | not reported                             |
| Blauvelt et.al.,2020 | IXORA-R (NCT03573323) | multicentre (2018.11-2020.01) | 24w | IXE 160 mg(0w)-80 mg(eow,2-12w)-80mg(q4w,14-24w)<br>GUS 100 mg (0w,4w,12w,20w)                  | 519 | GUS:49.0±14.9/<br>IXE:49.0±13.9  | not reported   | GUS:19.3±7.1/<br>IXE:19.95±7.9 | BSA ≥10% and sPGA ≥3 and PASI ≥12             | not reported                             |
| Reich et.al.,2019    | ECLIPSE (NCT03090100) | 142 sites (2017.04-2018.09)   | 48w | SEC 300mg(0w, 1w, 2w, 3w,q4w)<br>GUS 100 mg(0w,4w,q8w)                                          | 511 | SEC:45.3 ±13.6/<br>GUS:46.3±13.7 | SEC:15/GUS: 18 | SEC:20.1±7.6/<br>GUS:20.0 ±7.4 | PASI ≥12, IGA score ≥3, BSA≥10% for ≥6 months | inflammatory bowel disease were excluded |

<sup>1</sup>The Criteria of moderate-to-severe psoriasis was defined by the author of each included article.

**Figure 1.** Forest plot of pooled data of biological agents versus placebo on serious infections. There was no statistically significant difference in the risk of serious infections for patients receiving tumor necrosis factor inhibitors (TNFi), anti-interleukin (IL)-17 agents, or anti-IL-12/23 agents, compared to placebo. (a) TNFi vs. Placebo; (b) Anti-IL-17 agents vs. Placebo; (c) Anti-IL-12/23 agents vs. Placebo.

**(a) TNFi vs. Placebo**

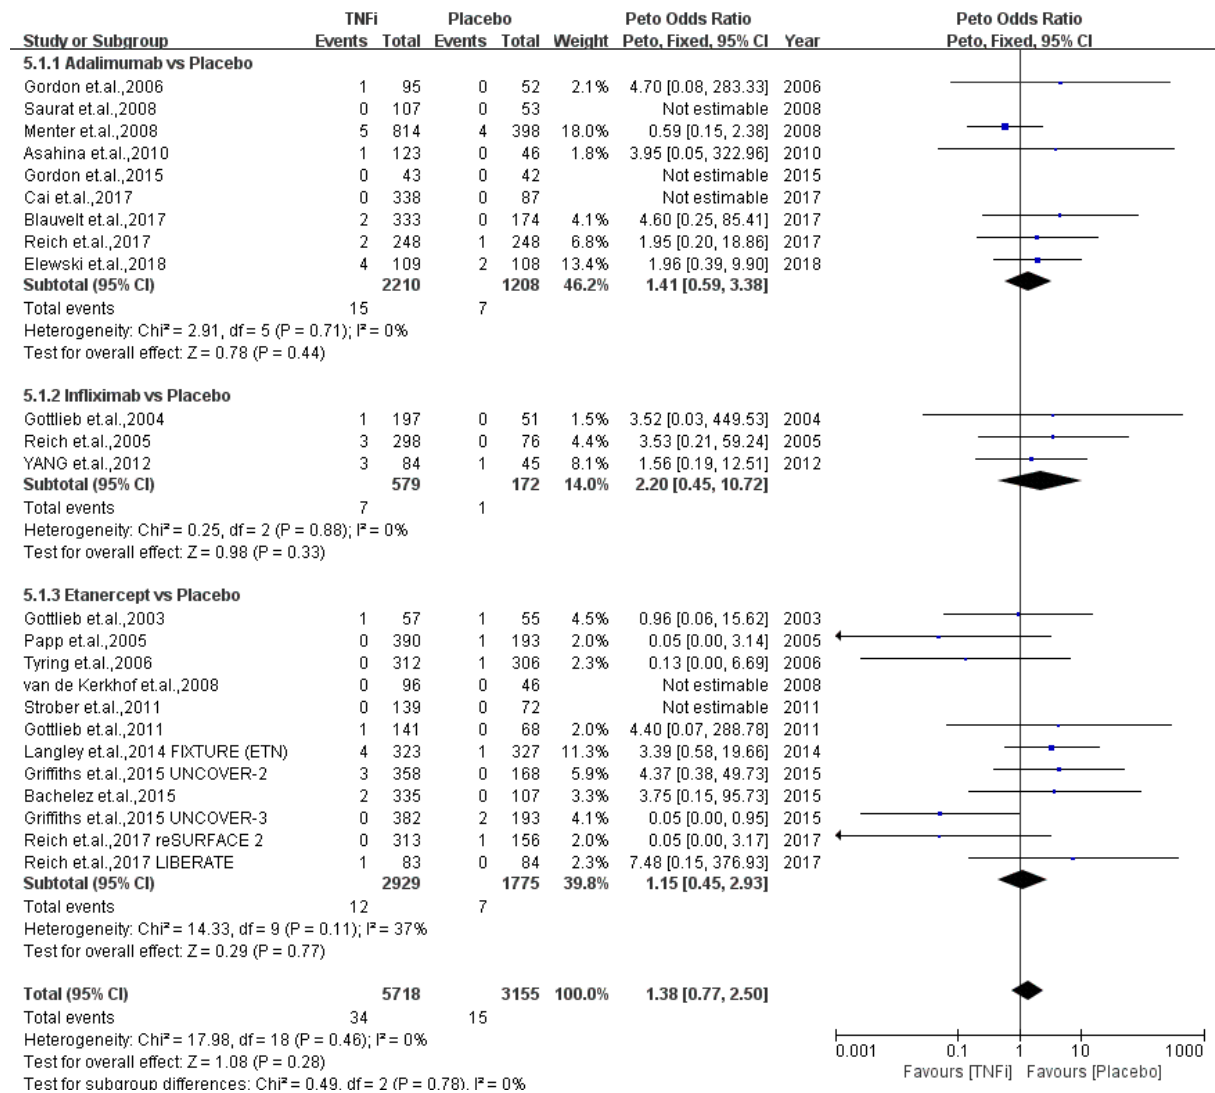

## (b) Anti-IL-17 agents vs. Placebo

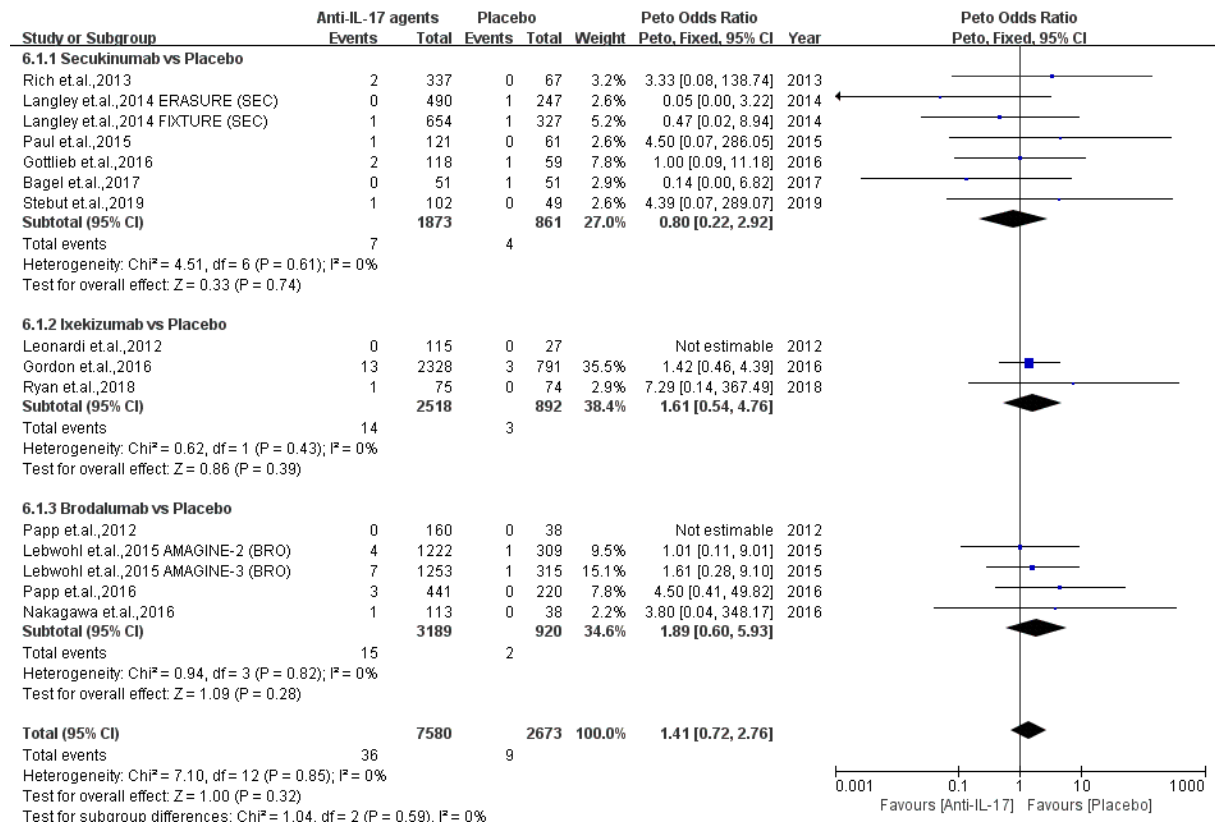

## (c) Anti-IL-12/23 agents vs. Placebo

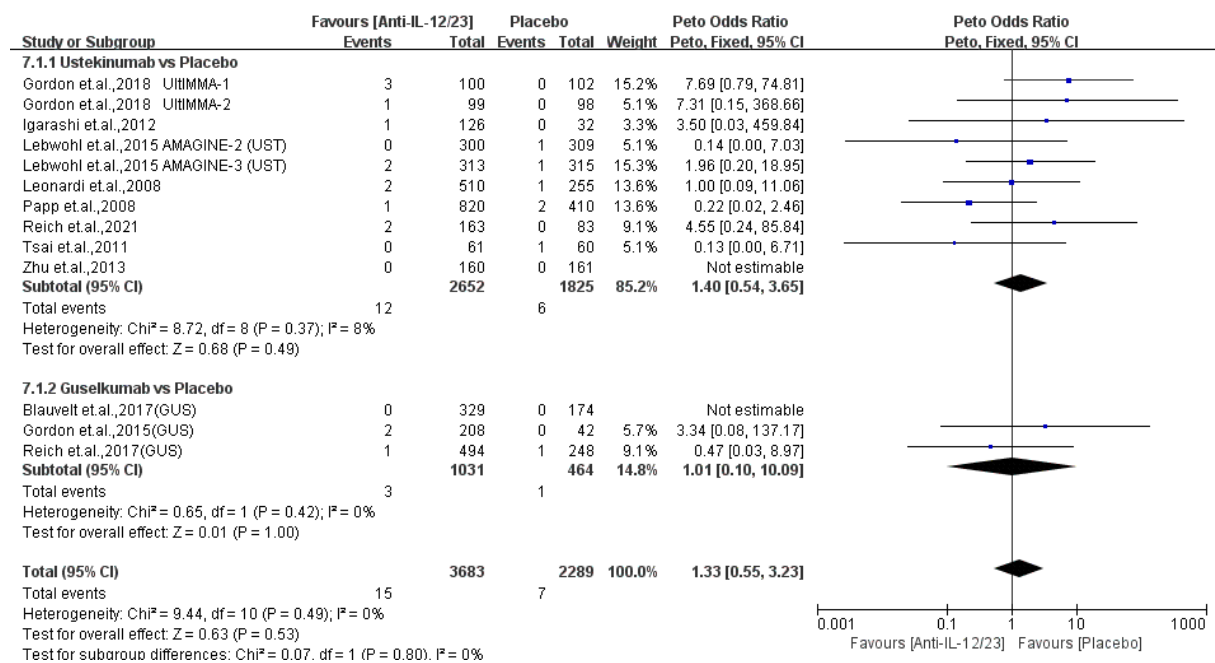



**Figure 2.** Forest plot of pooled data of biologic agents comparing to each other on serious infections. No significant difference in the risk of serious infection among different biologic agents was detected. (a) Anti-interleukin (IL)-17 agents vs. tumor necrosis factor inhibitors (TNFi); (b) Anti-IL-17 agents vs. Anti-IL-12/23 agents; (c) Anti-IL-12/23 agents vs. TNFi.

**(a) Anti-IL-17 agents vs. TNFi**

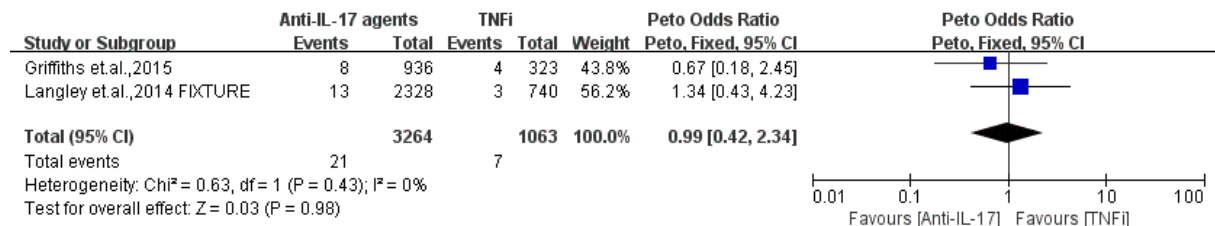

**(b) Anti-IL-17 agents vs. Anti-IL-12/23 agents**

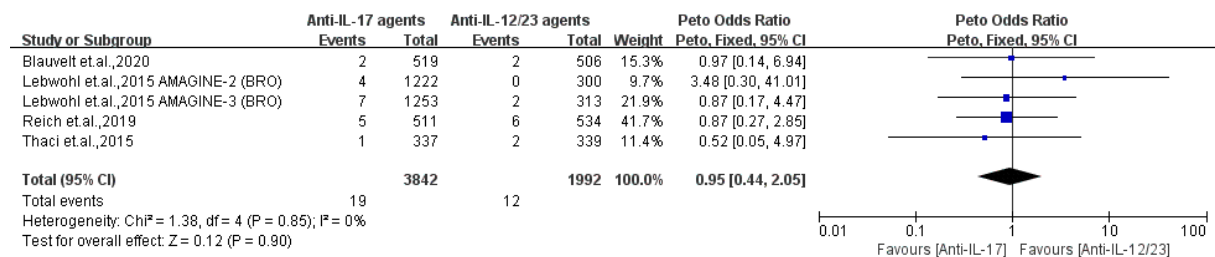

**(c) Anti-IL-12/23 agents vs. TNFi**

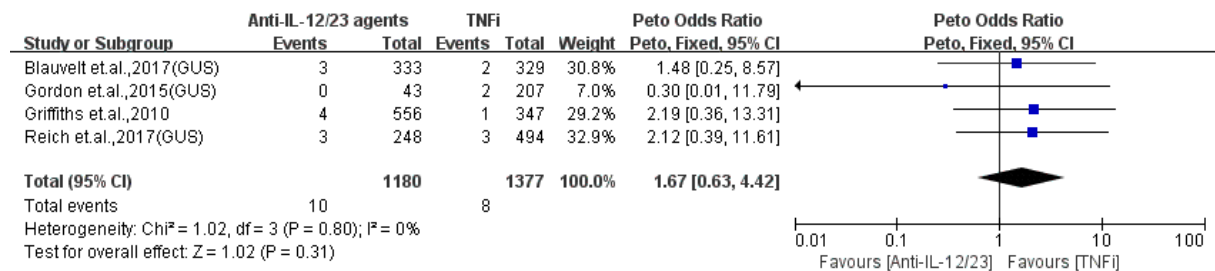

**Table 3.** Risk of bias assessment for randomize controlled trials (RCTs).

| Authors, year                                                   | Sequence generation | Allocation concealment | Blinding of participants and personnel | Blinding of outcome assessors | Incomplete outcome data | Selective outcome reporting | Other bias |
|-----------------------------------------------------------------|---------------------|------------------------|----------------------------------------|-------------------------------|-------------------------|-----------------------------|------------|
| <b>Anti-IL-17 agents vs. Placebo - Candida infections</b>       |                     |                        |                                        |                               |                         |                             |            |
| <b>Secukinumab vs. placebo</b>                                  |                     |                        |                                        |                               |                         |                             |            |
| Langley et.al., 2014 (ERASURE)                                  | Low                 | Low                    | Low                                    | Low                           | Low                     | Low                         | Low        |
| Langley et.al., 2014 (FIXTURE)                                  | Low                 | Low                    | Low                                    | Low                           | Low                     | Low                         | Low        |
| Paul et.al., 2015 (JUNCTURE)                                    | Low                 | Low                    | Low                                    | Low                           | Low                     | Low                         | Low        |
| Gottlieb et.al.,2016                                            | Low                 | Low                    | Low                                    | Low                           | Low                     | Low                         | Low        |
| Bagel et.al.,2017                                               | Low                 | Low                    | Low                                    | Low                           | Low                     | Low                         | Low        |
| von Stebut et.al.,2019                                          | Low                 | Low                    | Low                                    | Low                           | Low                     | Low                         | Low        |
| <b>Ixekizumab vs. placebo</b>                                   |                     |                        |                                        |                               |                         |                             |            |
| Gordon et.al., 2016 (UNCOVER)                                   | Low                 | Low                    | Low                                    | Low                           | Low                     | Low                         | Low        |
| <b>Brodalumab vs. placebo</b>                                   |                     |                        |                                        |                               |                         |                             |            |
| Lebwohl et.al.a., 2015 (AMAGINE 2)                              | Low                 | Low                    | Low                                    | Low                           | Low                     | Low                         | Low        |
| Lebwohl et.al.b., 2015 (AMAGINE 3)                              | Low                 | Low                    | Low                                    | Low                           | Low                     | Low                         | Low        |
| Nakagawa et.al.,2016                                            | Low                 | Low                    | Low                                    | High                          | High                    | Low                         | Unclear    |
| Papp et.al.,2016                                                | Low                 | Low                    | Low                                    | Low                           | Low                     | Low                         | Low        |
| <b>Biologic agents vs. Biologic agents - Candida infections</b> |                     |                        |                                        |                               |                         |                             |            |
| Langley et.al., 2014 (FIXTURE)                                  | Low                 | Low                    | Low                                    | Low                           | Low                     | Low                         | Low        |
| Lebwohl et.al.a., 2015 (AMAGINE 2)                              | Low                 | Low                    | Low                                    | Low                           | Low                     | Low                         | Low        |
| Lebwohl et.al.b., 2015 (AMAGINE 3)                              | Low                 | Low                    | Low                                    | Low                           | Low                     | Low                         | Low        |
| Griffiths et.al.,2015                                           | Low                 | Low                    | Low                                    | Low                           | Low                     | Low                         | Low        |
| Thaci et.al.,2015                                               | Low                 | Low                    | Low                                    | Low                           | Low                     | Low                         | Low        |
| Paul et.al.,2019                                                | Low                 | Low                    | Low                                    | High                          | Low                     | Low                         | Unclear    |
| Reich et.al.,2019                                               | Low                 | Low                    | Low                                    | Low                           | Low                     | Low                         | Low        |
| Blauvelt et.al.,2020                                            | Low                 | Low                    | Low                                    | Low                           | Low                     | Low                         | Low        |
| <b>Biologic agents vs. Placebo - Serious infections</b>         |                     |                        |                                        |                               |                         |                             |            |
| <b>Adalimumab vs. placebo</b>                                   |                     |                        |                                        |                               |                         |                             |            |
| Gordon et.al.,2006                                              | Low                 | Low                    | Low                                    | High                          | Low                     | Low                         | Low        |
| Menter et.al., 2008 (REVEAL)                                    | Low                 | Low                    | Unclear                                | Low                           | Low                     | Unclear                     | Unclear    |
| Saurat et.al., 2008 (CHAMPION)                                  | Low                 | Low                    | Low                                    | Low                           | Low                     | Unclear                     | Low        |
| Asahina et.al.,2010                                             | Low                 | Low                    | Low                                    | Unclear                       | Low                     | Low                         | Low        |
| Gordon et.al., 2015 (X-PLORE)                                   | Unclear             | Unclear                | High                                   | Unclear                       | Low                     | Unclear                     | Unclear    |
| Cai et.al.,2017                                                 | Unclear             | Unclear                | Unclear                                | Unclear                       | Low                     | Unclear                     | Unclear    |
| Blauvelt et.al.,2017                                            | Low                 | Low                    | Low                                    | Low                           | Low                     | Low                         | Low        |
| Reich et.al.,2017                                               | Low                 | Low                    | Low                                    | Low                           | Low                     | Low                         | Low        |
| Elewski et.al.,2018                                             | Low                 | Low                    | Low                                    | Unclear                       | Low                     | Low                         | Low        |
| <b>Infliximab vs. placebo</b>                                   |                     |                        |                                        |                               |                         |                             |            |
| Gottlieb et.al., 2004 (SPIRIT)                                  | Low                 | Low                    | Low                                    | Unclear                       | High                    | Unclear                     | Unclear    |
| Reich et.al., 2005 (EXPRESS)                                    | Low                 | Low                    | Low                                    | Low                           | Low                     | Unclear                     | Unclear    |
| Yang et.al., 2012                                               | Unclear             | Unclear                | Unclear                                | Unclear                       | Low                     | Unclear                     | Unclear    |

| Authors, year                      | Sequence generation | Allocation concealment | Blinding of participants and personnel | Blinding of outcome assessors | Incomplete outcome data | Selective outcome reporting | Other bias |
|------------------------------------|---------------------|------------------------|----------------------------------------|-------------------------------|-------------------------|-----------------------------|------------|
| <b>Etanercept vs. placebo</b>      |                     |                        |                                        |                               |                         |                             |            |
| Gottlieb et.al., 2003              | Low                 | Low                    | Low                                    | Low                           | High                    | Unclear                     | Unclear    |
| Papp et.al.,2005                   | Low                 | Low                    | Low                                    | Low                           | Low                     | Unclear                     | Unclear    |
| Tyring et.al., 2006                | Low                 | Low                    | Unclear                                | Unclear                       | Low                     | Low                         | Unclear    |
| van de Kerkhof et.al., 2008        | Low                 | Low                    | Unclear                                | Unclear                       | Low                     | Unclear                     | Unclear    |
| Gottlieb et.al., 2011              | Unclear             | Unclear                | Unclear                                | Unclear                       | Low                     | Low                         | Unclear    |
| Strober et.al., 2011               | Unclear             | Unclear                | Unclear                                | Unclear                       | Low                     | Low                         | Unclear    |
| Langley et.al., 2014 (FIXTURE)     | Low                 | Low                    | Low                                    | Low                           | Low                     | Low                         | Low        |
| Bachelez et.al., 2015              | Low                 | Low                    | Low                                    | Low                           | Low                     | Low                         | Low        |
| Griffiths et.al.,2015(UNCOVER-2)   | Low                 | Low                    | Low                                    | Unclear                       | Low                     | Low                         | Low        |
| Griffiths et.al.,2015(UNCOVER-3)   | Low                 | Low                    | Low                                    | Low                           | Low                     | Low                         | Low        |
| Reich et.al.,2017 (reSurface2)     | Low                 | Low                    | Low                                    | Low                           | Low                     | Low                         | Low        |
| Reich et.al.,2017 (LIBERATE)       | Low                 | Low                    | Low                                    | Low                           | Low                     | Low                         | Low        |
| <b>Ustekinumab vs. placebo</b>     |                     |                        |                                        |                               |                         |                             |            |
| Leonardi et.al., 2008 ( PHOENIX 1) | Low                 | Low                    | Low                                    | Low                           | Low                     | Unclear                     | Unclear    |
| Papp et.al., 2008 (PHOENIX 2)      | Low                 | Low                    | Low                                    | Unclear                       | Low                     | Unclear                     | Unclear    |
| Tsai et.al., 2011 (PEARL)          | Low                 | Low                    | Low                                    | Unclear                       | Low                     | Unclear                     | Unclear    |
| Igarashi et.al, 2012               | Unclear             | Unclear                | Unclear                                | Unclear                       | Low                     | Unclear                     | Unclear    |
| Zhu et.al., 2013 (LOTUS)           | Unclear             | Unclear                | Unclear                                | Unclear                       | Low                     | Low                         | Unclear    |
| Lebwohl et.al.a., 2015 (AMAGINE 2) | Low                 | Low                    | Low                                    | Low                           | Low                     | Low                         | Low        |
| Lebwohl et.al.b., 2015 (AMAGINE 3) | Low                 | Low                    | Low                                    | Low                           | Low                     | Low                         | Low        |
| Gordon et.al.,2018 (UltMMA-1)      | Low                 | Low                    | Low                                    | Low                           | Low                     | Low                         | Low        |
| Gordon et.al.,2018 (UltMMA-2)      | Low                 | Low                    | Low                                    | Unclear                       | Low                     | Low                         | Low        |
| Reich et.al.,2021                  | Low                 | Low                    | Low                                    | Low                           | Low                     | Low                         | Low        |
| <b>Guselkumab vs. placebo</b>      |                     |                        |                                        |                               |                         |                             |            |
| Gordon et.al.,2015                 | Unclear             | Unclear                | High                                   | Unclear                       | Low                     | Unclear                     | Unclear    |
| Blauvelt et.al.,2017               | Low                 | Low                    | Low                                    | Low                           | Low                     | Low                         | Low        |
| Reich et.al.,2017                  | Low                 | Low                    | Low                                    | Low                           | Low                     | Low                         | Low        |
| <b>Secukinumab vs. placebo</b>     |                     |                        |                                        |                               |                         |                             |            |
| Rich et.al.,2013                   | Low                 | Low                    | Low                                    | Unclear                       | Low                     | Low                         | Low        |
| Langley et.al., 2014 (ERASURE)     | Low                 | Low                    | Low                                    | Low                           | Low                     | Low                         | Low        |
| Langley et.al., 2014 (FIXTURE)     | Low                 | Low                    | Low                                    | Low                           | Low                     | Low                         | Low        |
| Paul et.al., 2015 (JUNCTURE)       | Low                 | Low                    | Low                                    | Low                           | Low                     | Low                         | Unclear    |
| Gottlieb et.al.,2016 (FEATURE)     | Low                 | Low                    | Low                                    | Low                           | Low                     | Low                         | Low        |
| Bagel et.al.,2017                  | Low                 | Low                    | Low                                    | Low                           | Low                     | Low                         | Unclear    |
| von Stebut et.al.,2019             | Low                 | Low                    | Low                                    | Low                           | Low                     | Low                         | Low        |
| <b>Ixekizumab vs. placebo</b>      |                     |                        |                                        |                               |                         |                             |            |
| Leonardi et.al.,2012               | Low                 | Low                    | Low                                    | Low                           | Low                     | Low                         | Low        |
| Gordon et.al., 2016 (UNCOVER)      | Low                 | Low                    | Low                                    | Low                           | Low                     | Low                         | Low        |
| Ryan et.al.,2018                   | Low                 | Low                    | Low                                    | Unclear                       | Low                     | Low                         | Low        |
| <b>Brodalumab vs. placebo</b>      |                     |                        |                                        |                               |                         |                             |            |

| Authors, year                                                   | Sequence generation | Allocation concealment | Blinding of participants and personnel | Blinding of outcome assessors | Incomplete outcome data | Selective outcome reporting | Other bias |
|-----------------------------------------------------------------|---------------------|------------------------|----------------------------------------|-------------------------------|-------------------------|-----------------------------|------------|
| Papp et.al.,2012                                                | Low                 | Low                    | Low                                    | Low                           | Low                     | Low                         | Low        |
| Lebwohl et.al.a., 2015 (AMAGINE 2)                              | Low                 | Low                    | Low                                    | Low                           | Low                     | Low                         | Low        |
| Lebwohl et.al.b., 2015 (AMAGINE 3)                              | Low                 | Low                    | Low                                    | Low                           | Low                     | Low                         | Low        |
| Nakagawa et.al.,2016                                            | Low                 | Low                    | Low                                    | High                          | High                    | Low                         | Unclear    |
| Papp et.al.,2016                                                | Low                 | Low                    | Low                                    | Low                           | Low                     | Low                         | Low        |
| <b>Biologic agents vs. Biologic agents - Serious infections</b> |                     |                        |                                        |                               |                         |                             |            |
| Griffiths et.al., 2010                                          | Low                 | Low                    | Unclear                                | Low                           | Low                     | Low                         | Low        |
| Langley et.al., 2014 (FIXTURE)                                  | Low                 | Low                    | Low                                    | Low                           | Low                     | Low                         | Low        |
| Gordon et.al.,2015                                              | Unclear             | Unclear                | High                                   | Unclear                       | Low                     | Unclear                     | Unclear    |
| Lebwohl et.al.a., 2015 (AMAGINE 2)                              | Low                 | Low                    | Low                                    | Low                           | Low                     | Low                         | Low        |
| Lebwohl et.al.b., 2015 (AMAGINE 3)                              | Low                 | Low                    | Low                                    | Low                           | Low                     | Low                         | Low        |
| Thaci et.al.,2015                                               | Low                 | Low                    | Low                                    | Low                           | Low                     | Low                         | Low        |
| Griffiths et.al., 2015(UNCOVER)                                 | Low                 | Low                    | Low                                    | Low                           | Low                     | Low                         | Low        |
| Blauvelt et.al.,2017                                            | Low                 | Low                    | Low                                    | Low                           | Low                     | Low                         | Low        |
| Reich et.al.,2017                                               | Low                 | Low                    | Low                                    | Low                           | Low                     | Low                         | Low        |
| Paul et.al.,2019                                                | Low                 | Low                    | Low                                    | Low                           | Low                     | Low                         | Low        |
| Reich et.al.,2019                                               | Low                 | Low                    | Low                                    | Low                           | Low                     | Low                         | Low        |
| Blauvelt et.al.,2020                                            | Low                 | Low                    | Low                                    | Low                           | Low                     | Low                         | Low        |
| <b>Biologic agents vs. Methotrexate - Serious infections</b>    |                     |                        |                                        |                               |                         |                             |            |
| Saurat et.al.,2008                                              | Low                 | Low                    | Low                                    | Low                           | Low                     | Unclear                     | Low        |
| Reich et.al.,2019                                               | Low                 | High                   | High                                   | Low                           | Low                     | Low                         | Low        |

**Table 4.** Quality of evidence on *Candida* infections using Grades of Recommendations Assessment, Development and Evaluation (GRADE). (a) Anti-interleukin (IL)-17 agents vs. Placebo; (b) Anti-IL-17 agents vs. Anti-IL-12/23 agents; (c) Anti-IL-17 agents vs. tumor necrosis factor inhibitors (TNFi).

**(a) Anti-IL-17 agents vs. Placebo**

| <b>Anti-IL-17 agents vs. Placebo - Candida infections</b>                            |                         |                          |                         |                        |                         |                                    |                                       |                               |                                 |                                                 |                                                        |
|--------------------------------------------------------------------------------------|-------------------------|--------------------------|-------------------------|------------------------|-------------------------|------------------------------------|---------------------------------------|-------------------------------|---------------------------------|-------------------------------------------------|--------------------------------------------------------|
| <b>Quality assessment</b>                                                            |                         |                          |                         |                        |                         |                                    | <b>Summary of Findings</b>            |                               |                                 |                                                 |                                                        |
| <b>Participants (studies) Follow up</b>                                              | <b>Risk of bias</b>     | <b>Inconsistency</b>     | <b>Indirectness</b>     | <b>Imprecision</b>     | <b>Publication bias</b> | <b>Overall quality of evidence</b> | <b>Study event rates (%)</b>          |                               | <b>Relative effect (95% CI)</b> | <b>Anticipated absolute effects</b>             |                                                        |
|                                                                                      |                         |                          |                         |                        |                         |                                    | <b>With Placebo-Candida infection</b> | <b>With Anti-IL-17 agents</b> |                                 | <b>Risk with Placebo - Candida infection</b>    | <b>Risk difference with Anti-IL-17 agents (95% CI)</b> |
| <b>Anti-IL-17 agents vs. Placebo for candida infection</b>                           |                         |                          |                         |                        |                         |                                    |                                       |                               |                                 |                                                 |                                                        |
| 9852 (11 studies)                                                                    | no serious risk of bias | no serious inconsistency | no serious indirectness | no serious imprecision | undetected              | ⊕⊕⊕⊕<br><b>HIGH</b>                | 13/2465 (0.5%)                        | 113/7387 (1.5%)               | <b>OR 2.3</b> (1.54 to 3.45)    | <b>Study population</b>                         |                                                        |
|                                                                                      |                         |                          |                         |                        |                         |                                    |                                       |                               |                                 | <b>5 per 1000</b>                               | <b>7 more per 1000</b> (from 3 more to 13 more)        |
|                                                                                      |                         |                          |                         |                        |                         |                                    |                                       |                               |                                 | <b>Moderate</b>                                 |                                                        |
|                                                                                      |                         |                          |                         |                        |                         |                                    |                                       |                               | <b>4 per 1000</b>               | <b>5 more per 1000</b> (from 2 more to 10 more) |                                                        |
| <b>Anti-IL-17 agents vs. Placebo for candida infection - Secukinumab vs. Placebo</b> |                         |                          |                         |                        |                         |                                    |                                       |                               |                                 |                                                 |                                                        |
| 2824 (6 studies)                                                                     | no serious risk of bias | no serious inconsistency | no serious indirectness | no serious imprecision | undetected              | ⊕⊕⊕⊕<br><b>HIGH</b>                | 3/794 (0.4%)                          | 54/2030 (2.7%)                | <b>OR 3.22</b> (1.79 to 5.8)    | <b>Study population</b>                         |                                                        |
|                                                                                      |                         |                          |                         |                        |                         |                                    |                                       |                               |                                 | <b>4 per 1000</b>                               | <b>8 more per 1000</b> (from 3 more to 18 more)        |
|                                                                                      |                         |                          |                         |                        |                         |                                    |                                       |                               |                                 | <b>Moderate</b>                                 |                                                        |
|                                                                                      |                         |                          |                         |                        |                         |                                    |                                       |                               | <b>2 per 1000</b>               | <b>4 more per 1000</b> (from 2 more to 9 more)  |                                                        |

| Anti-IL-17 agents vs. Placebo for candida infection - Ixekizumab vs. Placebo |                            |                             |                            |                           |            |                                                         |                 |                   |                                     |                                                        |                                                        |
|------------------------------------------------------------------------------|----------------------------|-----------------------------|----------------------------|---------------------------|------------|---------------------------------------------------------|-----------------|-------------------|-------------------------------------|--------------------------------------------------------|--------------------------------------------------------|
| 3119<br>(1 study)                                                            | no serious<br>risk of bias | no serious<br>inconsistency | no serious<br>indirectness | very serious <sup>1</sup> | undetected | ⊕⊕⊕⊕<br><b>LOW<sup>1</sup></b><br>due to<br>imprecision | 4/791<br>(0.5%) | 23/2328<br>(1%)   | <b>OR 1.75</b><br>(0.73 to<br>4.19) | <b>Study population</b>                                |                                                        |
|                                                                              |                            |                             |                            |                           |            |                                                         |                 |                   |                                     | <b>5 per 1000</b>                                      | <b>4 more per 1000</b><br>(from 1 fewer to 16<br>more) |
|                                                                              |                            |                             |                            |                           |            |                                                         |                 |                   |                                     | <b>Moderate</b>                                        |                                                        |
|                                                                              |                            |                             |                            |                           |            |                                                         |                 |                   | <b>5 per 1000</b>                   | <b>4 more per 1000</b><br>(from 1 fewer to 16<br>more) |                                                        |
| Anti-IL-17 agents vs. Placebo for candida infection - Brodalumab vs. Placebo |                            |                             |                            |                           |            |                                                         |                 |                   |                                     |                                                        |                                                        |
| 3909<br>(4 studies)                                                          | no serious<br>risk of bias | no serious<br>inconsistency | no serious<br>indirectness | very serious <sup>1</sup> | undetected | ⊕⊕⊕⊕<br><b>LOW<sup>1</sup></b><br>due to<br>imprecision | 6/880<br>(0.7%) | 36/3029<br>(1.2%) | <b>OR 1.66</b><br>(0.8 to<br>3.44)  | <b>Study population</b>                                |                                                        |
|                                                                              |                            |                             |                            |                           |            |                                                         |                 |                   |                                     | <b>7 per 1000</b>                                      | <b>4 more per 1000</b><br>(from 1 fewer to 16<br>more) |
|                                                                              |                            |                             |                            |                           |            |                                                         |                 |                   |                                     | <b>Moderate</b>                                        |                                                        |
|                                                                              |                            |                             |                            |                           |            |                                                         |                 |                   | <b>5 per 1000</b>                   | <b>3 more per 1000</b><br>(from 1 fewer to 12<br>more) |                                                        |

<sup>1</sup> Very serious imprecision-lower boundary indicates appreciable benefit while upper boundary indicates appreciable harm.

**(b) Anti-IL-17 agents vs. Anti-IL-12/23 agents**

| Anti-IL-17 agents vs. Anti-IL-12/23 agents - Candida infection |                         |                          |                         |                      |                  |                                                            |                                                 |                        |                                  |                                                      |                                                     |
|----------------------------------------------------------------|-------------------------|--------------------------|-------------------------|----------------------|------------------|------------------------------------------------------------|-------------------------------------------------|------------------------|----------------------------------|------------------------------------------------------|-----------------------------------------------------|
| Quality assessment                                             |                         |                          |                         |                      |                  |                                                            | Summary of Findings                             |                        |                                  |                                                      |                                                     |
| Participants (studies)<br>Follow up                            | Risk of bias            | Inconsistency            | Indirectness            | Imprecision          | Publication bias | Overall quality of evidence                                | Study event rates (%)                           |                        | Relative effect (95% CI)         | Anticipated absolute effects                         |                                                     |
|                                                                |                         |                          |                         |                      |                  |                                                            | With Anti-IL-12/23 agents for Candida infection | With Anti-IL-17 agents |                                  | Risk with Anti-IL-12/23 agents for Candida infection | Risk difference with Anti-IL-17 agents (95% CI)     |
| <b>Anti-IL-17 agents vs. Anti-IL-12/23 agents</b>              |                         |                          |                         |                      |                  |                                                            |                                                 |                        |                                  |                                                      |                                                     |
| 6130 (6 studies)                                               | no serious risk of bias | no serious inconsistency | no serious indirectness | serious <sup>1</sup> | undetected       | ⊕⊕⊕⊕<br><b>MODERATE</b> <sup>1</sup><br>due to imprecision | 23/2155 (1.1%)                                  | 84/3975 (2.1%)         | <b>OR 2.55</b><br>(1.69 to 3.83) | <b>Study population</b>                              |                                                     |
|                                                                |                         |                          |                         |                      |                  |                                                            |                                                 |                        |                                  | <b>11 per 1000</b>                                   | <b>16 more per 1000</b><br>(from 7 more to 29 more) |
|                                                                |                         |                          |                         |                      |                  |                                                            |                                                 |                        |                                  | <b>Moderate</b>                                      |                                                     |
|                                                                |                         |                          |                         |                      |                  |                                                            |                                                 |                        | <b>11 per 1000</b>               | <b>17 more per 1000</b><br>(from 7 more to 30 more)  |                                                     |

<sup>1</sup> Serious imprecision-the 95% CI is wide, however, without containing 1.

**(c) Anti-IL-17 agents vs. TNFi**

| Anti-IL-17 agents vs. TNFi - Candida infection |                         |                          |                         |                           |                  |                                                      |                               |                        |                                  |                                    |                                                     |
|------------------------------------------------|-------------------------|--------------------------|-------------------------|---------------------------|------------------|------------------------------------------------------|-------------------------------|------------------------|----------------------------------|------------------------------------|-----------------------------------------------------|
| Quality assessment                             |                         |                          |                         |                           |                  |                                                      | Summary of Findings           |                        |                                  |                                    |                                                     |
| Participants (studies)<br>Follow up            | Risk of bias            | Inconsistency            | Indirectness            | Imprecision               | Publication bias | Overall quality of evidence                          | Study event rates (%)         |                        | Relative effect (95% CI)         | Anticipated absolute effects       |                                                     |
|                                                |                         |                          |                         |                           |                  |                                                      | With TNFi - Candida infection | With Anti-IL-17 agents |                                  | Risk with TNFi - Candida infection | Risk difference with Anti-IL-17 agents (95% CI)     |
| <b>Anti-IL-17 agents vs. TNFi</b>              |                         |                          |                         |                           |                  |                                                      |                               |                        |                                  |                                    |                                                     |
| 4327 (2 studies)                               | no serious risk of bias | no serious inconsistency | no serious indirectness | very serious <sup>1</sup> | undetected       | ⊕⊕⊕⊕<br><b>LOW<sup>1</sup></b><br>due to imprecision | 9;1063 (0.8%)                 | 49;3264 (1.5%)         | <b>OR 1.68</b><br>(0.92 to 3.07) | <b>Study population</b>            |                                                     |
|                                                |                         |                          |                         |                           |                  |                                                      |                               |                        |                                  | <b>8 per 1000</b>                  | <b>6 more per 1000</b><br>(from 1 fewer to 17 more) |
|                                                |                         |                          |                         |                           |                  |                                                      |                               |                        |                                  | <b>Moderate</b>                    |                                                     |
|                                                |                         |                          |                         |                           |                  |                                                      |                               |                        |                                  | <b>10 per 1000</b>                 | <b>7 more per 1000</b><br>(from 1 fewer to 20 more) |

<sup>1</sup>Very serious imprecision-lower boundary indicates appreciable benefit while upper boundary indicates appreciable harm.



**Table 5.** Quality of evidence on serious infections using Grades of Recommendations Assessment, Development and Evaluation (GRADE). (a) Biologics vs. Placebo; (b) tumor necrosis factor inhibitors (TNFi) vs. Placebo; (c) Anti-interleukin (IL)-17 agents vs. Placebo; (d) Anti-IL-12/23 agents vs. Placebo; (e) Anti-IL-17 agents vs. TNFi; (f) Anti-IL-17 agents vs. Anti-IL-12/23 agents; (g) Anti-IL-12/23 agents vs. TNFi.

**(a) Biologics vs. Placebo**

| <b>Biologics vs. Placebo - Serious infections</b> |                      |                          |                         |                           |                         |                                                                            |                              |                       |                                  |                                     |                                                    |
|---------------------------------------------------|----------------------|--------------------------|-------------------------|---------------------------|-------------------------|----------------------------------------------------------------------------|------------------------------|-----------------------|----------------------------------|-------------------------------------|----------------------------------------------------|
| <b>Quality assessment</b>                         |                      |                          |                         |                           |                         |                                                                            | <b>Summary of Findings</b>   |                       |                                  |                                     |                                                    |
| <b>Participants (studies) Follow up</b>           | <b>Risk of bias</b>  | <b>Inconsistency</b>     | <b>Indirectness</b>     | <b>Imprecision</b>        | <b>Publication bias</b> | <b>Overall quality of evidence</b>                                         | <b>Study event rates (%)</b> |                       | <b>Relative effect (95% CI)</b>  | <b>Anticipated absolute effects</b> |                                                    |
|                                                   |                      |                          |                         |                           |                         |                                                                            | <b>With Placebo</b>          | <b>With Biologics</b> |                                  | <b>Risk with Placebo</b>            | <b>Risk difference with Biologics (95% CI)</b>     |
| <b>Biologics vs Placebo</b>                       |                      |                          |                         |                           |                         |                                                                            |                              |                       |                                  |                                     |                                                    |
| 25098 (52 studies)                                | serious <sup>1</sup> | no serious inconsistency | no serious indirectness | very serious <sup>2</sup> | undetected              | ⊕⊕⊕⊕<br><b>VERY LOW</b> <sup>1,2</sup><br>due to risk of bias, imprecision | 31/8117 (0.4%)               | 85/16981 (0.5%)       | <b>OR 1.38</b><br>(0.93 to 2.06) | <b>Study population</b>             |                                                    |
|                                                   |                      |                          |                         |                           |                         |                                                                            |                              |                       |                                  | <b>4 per 1000</b>                   | <b>1 more per 1000</b><br>(from 0 fewer to 4 more) |
|                                                   |                      |                          |                         |                           |                         |                                                                            |                              |                       |                                  | <b>Moderate</b>                     |                                                    |
|                                                   |                      |                          |                         |                           |                         |                                                                            |                              |                       |                                  | <b>0 per 1000</b>                   | -                                                  |

<sup>1</sup> Information from studies at high risk of bias.

<sup>2</sup> Very serious imprecision-lower boundary indicates appreciable benefit while upper boundary indicates appreciable harm.

**(b) TNFi vs. Placebo**

| <b>TNFi vs. placebo - Serious infection</b>      |                      |                          |                         |                           |                         |                                                                            |                              |                   |                                  |                                     |                                                     |
|--------------------------------------------------|----------------------|--------------------------|-------------------------|---------------------------|-------------------------|----------------------------------------------------------------------------|------------------------------|-------------------|----------------------------------|-------------------------------------|-----------------------------------------------------|
| <b>Quality assessment</b>                        |                      |                          |                         |                           |                         |                                                                            | <b>Summary of Findings</b>   |                   |                                  |                                     |                                                     |
| <b>Participants (studies) Follow up</b>          | <b>Risk of bias</b>  | <b>Inconsistency</b>     | <b>Indirectness</b>     | <b>Imprecision</b>        | <b>Publication bias</b> | <b>Overall quality of evidence</b>                                         | <b>Study event rates (%)</b> |                   | <b>Relative effect (95% CI)</b>  | <b>Anticipated absolute effects</b> |                                                     |
|                                                  |                      |                          |                         |                           |                         |                                                                            | <b>With Placebo</b>          | <b>With TNFi</b>  |                                  | <b>Risk with Placebo</b>            | <b>Risk difference with TNFi (95% CI)</b>           |
| <b>TNFi vs. Placebo</b>                          |                      |                          |                         |                           |                         |                                                                            |                              |                   |                                  |                                     |                                                     |
| 8873<br>(24 studies)                             | serious <sup>1</sup> | no serious inconsistency | no serious indirectness | very serious <sup>2</sup> | undetected              | ⊕⊕⊕⊕<br><b>VERY LOW</b> <sup>1,2</sup><br>due to risk of bias, imprecision | 15;3155<br>(0.5%)            | 34;5718<br>(0.6%) | <b>OR 1.38</b><br>(0.77 to 2.5)  | <b>Study population</b>             |                                                     |
|                                                  |                      |                          |                         |                           |                         |                                                                            |                              |                   |                                  | <b>5 per 1000</b>                   | <b>2 more per 1000</b><br>(from 1 fewer to 7 more)  |
|                                                  |                      |                          |                         |                           |                         |                                                                            |                              |                   |                                  | <b>Moderate</b>                     |                                                     |
|                                                  |                      |                          |                         |                           |                         |                                                                            |                              |                   | <b>0 per 1000</b>                | -                                   |                                                     |
| <b>TNFi vs. Placebo - Adalimumab vs. Placebo</b> |                      |                          |                         |                           |                         |                                                                            |                              |                   |                                  |                                     |                                                     |
| 3418<br>(9 studies)                              | serious <sup>1</sup> | no serious inconsistency | no serious indirectness | very serious <sup>2</sup> | undetected              | ⊕⊕⊕⊕<br><b>VERY LOW</b> <sup>1,2</sup><br>due to risk of bias, imprecision | 7;1208<br>(0.6%)             | 15;2210<br>(0.7%) | <b>OR 1.41</b><br>(0.59 to 3.38) | <b>Study population</b>             |                                                     |
|                                                  |                      |                          |                         |                           |                         |                                                                            |                              |                   |                                  | <b>6 per 1000</b>                   | <b>2 more per 1000</b><br>(from 2 fewer to 14 more) |
|                                                  |                      |                          |                         |                           |                         |                                                                            |                              |                   |                                  | <b>Moderate</b>                     |                                                     |
|                                                  |                      |                          |                         |                           |                         |                                                                            |                              |                   | <b>0 per 1000</b>                | -                                   |                                                     |
| <b>TNFi vs. Placebo - Infliximab vs. Placebo</b> |                      |                          |                         |                           |                         |                                                                            |                              |                   |                                  |                                     |                                                     |
| 751<br>(3 studies)                               | serious <sup>1</sup> | no serious inconsistency | no serious indirectness | very serious <sup>2</sup> | undetected              | ⊕⊕⊕⊕<br><b>VERY LOW</b> <sup>1,2</sup><br>due to risk of bias, imprecision | 1;172<br>(0.6%)              | 7;579<br>(1.2%)   | <b>OR 2.2</b><br>(0.45 to 10.72) | <b>Study population</b>             |                                                     |
|                                                  |                      |                          |                         |                           |                         |                                                                            |                              |                   |                                  | <b>6 per 1000</b>                   | <b>7 more per 1000</b><br>(from 3 fewer to 53 more) |
|                                                  |                      |                          |                         |                           |                         |                                                                            |                              |                   |                                  | <b>Moderate</b>                     |                                                     |
|                                                  |                      |                          |                         |                           |                         |                                                                            |                              |                   | <b>0 per 1000</b>                | -                                   |                                                     |

| TNFi vs. Placebo - Etanercept vs. Placebo |                         |                          |                         |                           |            |                                                       |                  |                   |                                  |                         |                                                    |
|-------------------------------------------|-------------------------|--------------------------|-------------------------|---------------------------|------------|-------------------------------------------------------|------------------|-------------------|----------------------------------|-------------------------|----------------------------------------------------|
| 4704<br>(12 studies)                      | no serious risk of bias | no serious inconsistency | no serious indirectness | very serious <sup>2</sup> | undetected | ⊕⊕⊕⊕<br><b>LOW</b> <sup>2</sup><br>due to imprecision | 7;1775<br>(0.4%) | 12;2929<br>(0.4%) | <b>OR 1.15</b><br>(0.45 to 2.93) | <b>Study population</b> |                                                    |
|                                           |                         |                          |                         |                           |            |                                                       |                  |                   |                                  | <b>4 per 1000</b>       | <b>1 more per 1000</b><br>(from 2 fewer to 8 more) |
|                                           |                         |                          |                         |                           |            |                                                       |                  |                   |                                  | <b>Moderate</b>         |                                                    |
|                                           |                         |                          |                         |                           |            |                                                       |                  |                   |                                  | <b>2 per 1000</b>       | <b>0 more per 1000</b><br>(from 1 fewer to 4 more) |

<sup>1</sup> Information from studies at high risk of bias.

<sup>2</sup> Very serious imprecision-lower boundary indicates appreciable benefit while upper boundary indicates appreciable harm.

(c) Anti-IL-17 agents vs. Placebo

| Anti-IL-17 agents vs. Placebo - Serious infection                       |                         |                          |                         |                           |                  |                                                      |                       |                        |                                  |                              |                                                     |
|-------------------------------------------------------------------------|-------------------------|--------------------------|-------------------------|---------------------------|------------------|------------------------------------------------------|-----------------------|------------------------|----------------------------------|------------------------------|-----------------------------------------------------|
| Quality assessment                                                      |                         |                          |                         |                           |                  |                                                      | Summary of Findings   |                        |                                  |                              |                                                     |
| Participants (studies)<br>Follow up                                     | Risk of bias            | Inconsistency            | Indirectness            | Imprecision               | Publication bias | Overall quality of evidence                          | Study event rates (%) |                        | Relative effect (95% CI)         | Anticipated absolute effects |                                                     |
|                                                                         |                         |                          |                         |                           |                  |                                                      | With Placebo          | With Anti-IL-17 agents |                                  | Risk with Placebo            | Risk difference with Anti-IL-17 agents (95% CI)     |
| <b>Anti-IL-17 agents subgroup vs. Placebo</b>                           |                         |                          |                         |                           |                  |                                                      |                       |                        |                                  |                              |                                                     |
| 10253<br>(15 studies)                                                   | no serious risk of bias | no serious inconsistency | no serious indirectness | very serious <sup>1</sup> | undetected       | ⊕⊕⊕⊕<br><b>LOW<sup>1</sup></b><br>due to imprecision | 9/2673<br>(0.3%)      | 36/7580<br>(0.5%)      | <b>OR 1.41</b><br>(0.72 to 2.76) | <b>Study population</b>      |                                                     |
|                                                                         |                         |                          |                         |                           |                  |                                                      |                       |                        |                                  | <b>3 per 1000</b>            | <b>1 more per 1000</b><br>(from 1 fewer to 6 more)  |
|                                                                         |                         |                          |                         |                           |                  |                                                      |                       |                        |                                  | <b>Moderate</b>              |                                                     |
|                                                                         |                         |                          |                         |                           |                  |                                                      |                       |                        |                                  | <b>0 per 1000</b>            | -                                                   |
| <b>Anti-IL-17 agents subgroup vs. Placebo - Secukinumab vs. Placebo</b> |                         |                          |                         |                           |                  |                                                      |                       |                        |                                  |                              |                                                     |
| 2734<br>(7 studies)                                                     | no serious risk of bias | no serious inconsistency | no serious indirectness | very serious <sup>1</sup> | undetected       | ⊕⊕⊕⊕<br><b>LOW<sup>1</sup></b><br>due to imprecision | 4/861<br>(0.5%)       | 7/1873<br>(0.4%)       | <b>OR 0.8</b><br>(0.22 to 2.92)  | <b>Study population</b>      |                                                     |
|                                                                         |                         |                          |                         |                           |                  |                                                      |                       |                        |                                  | <b>5 per 1000</b>            | <b>1 fewer per 1000</b><br>(from 4 fewer to 9 more) |
|                                                                         |                         |                          |                         |                           |                  |                                                      |                       |                        |                                  | <b>Moderate</b>              |                                                     |
|                                                                         |                         |                          |                         |                           |                  |                                                      |                       |                        |                                  | <b>3 per 1000</b>            | <b>1 fewer per 1000</b><br>(from 2 fewer to 6 more) |
| <b>Anti-IL-17 agents subgroup vs. Placebo - Ixekizumab vs. Placebo</b>  |                         |                          |                         |                           |                  |                                                      |                       |                        |                                  |                              |                                                     |
| 3410<br>(3 studies)                                                     | no serious risk of bias | no serious inconsistency | no serious indirectness | very serious <sup>1</sup> | undetected       | ⊕⊕⊕⊕<br><b>LOW<sup>1</sup></b><br>due to imprecision | 3/892<br>(0.3%)       | 14/2518<br>(0.6%)      | <b>OR 1.61</b><br>(0.54 to 4.76) | <b>Study population</b>      |                                                     |
|                                                                         |                         |                          |                         |                           |                  |                                                      |                       |                        |                                  | <b>3 per 1000</b>            | <b>2 more per 1000</b><br>(from 2 fewer to 12 more) |
|                                                                         |                         |                          |                         |                           |                  |                                                      |                       |                        |                                  | <b>Moderate</b>              |                                                     |
|                                                                         |                         |                          |                         |                           |                  |                                                      |                       |                        |                                  | <b>0 per 1000</b>            | -                                                   |

| Anti-IL-17 agents subgroup vs. Placebo - Brodalumab vs. Placebo |                         |                          |                         |                           |            |                                                       |                 |                   |                                 |                         |                                                     |
|-----------------------------------------------------------------|-------------------------|--------------------------|-------------------------|---------------------------|------------|-------------------------------------------------------|-----------------|-------------------|---------------------------------|-------------------------|-----------------------------------------------------|
| 4109<br>(5 studies)                                             | no serious risk of bias | no serious inconsistency | no serious indirectness | very serious <sup>1</sup> | undetected | ⊕⊕⊕⊕<br><b>LOW</b> <sup>1</sup><br>due to imprecision | 2/920<br>(0.2%) | 15/3189<br>(0.5%) | <b>OR 1.89</b><br>(0.6 to 5.93) | <b>Study population</b> |                                                     |
|                                                                 |                         |                          |                         |                           |            |                                                       |                 |                   |                                 | <b>2 per 1000</b>       | <b>2 more per 1000</b><br>(from 1 fewer to 11 more) |
|                                                                 |                         |                          |                         |                           |            |                                                       |                 |                   |                                 | <b>Moderate</b>         |                                                     |
|                                                                 |                         |                          |                         |                           |            |                                                       |                 |                   | <b>0 per 1000</b>               | -                       |                                                     |

<sup>1</sup>Very serious imprecision-lower boundary indicates appreciable benefit while upper boundary indicates appreciable harm.

#### (d) Anti-IL-12/23 agents vs. Placebo

| Anti-IL-12/23 agents vs. placebo - Serious infection |                      |                          |                         |                           |                  |                                                                           |                       |                           |                                  |                              |                                                    |
|------------------------------------------------------|----------------------|--------------------------|-------------------------|---------------------------|------------------|---------------------------------------------------------------------------|-----------------------|---------------------------|----------------------------------|------------------------------|----------------------------------------------------|
| Quality assessment                                   |                      |                          |                         |                           |                  |                                                                           | Summary of Findings   |                           |                                  |                              |                                                    |
| Participants (studies)<br>Follow up                  | Risk of bias         | Inconsistency            | Indirectness            | Imprecision               | Publication bias | Overall quality of evidence                                               | Study event rates (%) |                           | Relative effect (95% CI)         | Anticipated absolute effects |                                                    |
|                                                      |                      |                          |                         |                           |                  |                                                                           | With Placebo          | With Anti-IL-12/23 agents |                                  | Risk with Placebo            | Risk difference with Anti-IL-12/23 agents (95% CI) |
| <b>Anti-IL-12/23 agents vs Placebo</b>               |                      |                          |                         |                           |                  |                                                                           |                       |                           |                                  |                              |                                                    |
| 5972<br>(13 studies)                                 | serious <sup>1</sup> | no serious inconsistency | no serious indirectness | very serious <sup>2</sup> | undetected       | ⊕⊕⊕<br><b>VERY LOW</b> <sup>1,2</sup><br>due to risk of bias, imprecision | 7/2289<br>(0.3%)      | 15/3683<br>(0.4%)         | <b>OR 1.33</b><br>(0.55 to 3.23) | <b>Study population</b>      |                                                    |
|                                                      |                      |                          |                         |                           |                  |                                                                           |                       |                           |                                  | <b>3 per 1000</b>            | <b>1 more per 1000</b><br>(from 1 fewer to 7 more) |
|                                                      |                      |                          |                         |                           |                  |                                                                           |                       |                           |                                  | <b>Moderate</b>              |                                                    |
|                                                      |                      |                          |                         |                           |                  |                                                                           |                       |                           | <b>0 per 1000</b>                | -                            |                                                    |

| Anti-IL-12/23 agents vs Placebo - Ustekinumab vs Placebo |                         |                          |                         |                           |            |                                                                              |                  |                   |                                     |                                                    |                                                     |
|----------------------------------------------------------|-------------------------|--------------------------|-------------------------|---------------------------|------------|------------------------------------------------------------------------------|------------------|-------------------|-------------------------------------|----------------------------------------------------|-----------------------------------------------------|
| 4477<br>(10 studies)                                     | serious <sup>1</sup>    | no serious inconsistency | no serious indirectness | very serious <sup>2</sup> | undetected | ⊕⊕⊕<br><b>VERY LOW</b> <sup>1,2</sup><br>due to risk of bias,<br>imprecision | 6/1825<br>(0.3%) | 12/2652<br>(0.5%) | <b>OR 1.4</b><br>(0.54 to<br>3.65)  | <b>Study population</b>                            |                                                     |
|                                                          |                         |                          |                         |                           |            |                                                                              |                  |                   |                                     | <b>3 per 1000</b>                                  | <b>1 more per 1000</b><br>(from 2 fewer to 9 more)  |
|                                                          |                         |                          |                         |                           |            |                                                                              |                  |                   |                                     | <b>Moderate</b>                                    |                                                     |
|                                                          |                         |                          |                         |                           |            |                                                                              |                  |                   | <b>2 per 1000</b>                   | <b>1 more per 1000</b><br>(from 1 fewer to 5 more) |                                                     |
| Anti-IL-12/23 agents vs Placebo - Guselkumab vs Placebo  |                         |                          |                         |                           |            |                                                                              |                  |                   |                                     |                                                    |                                                     |
| 1495<br>(3 studies)                                      | no serious risk of bias | no serious inconsistency | no serious indirectness | serious <sup>2</sup>      | undetected | ⊕⊕⊕⊕⊖<br><b>MODERATE</b> <sup>2</sup><br>due to imprecision                  | 1/464<br>(0.2%)  | 3/1031<br>(0.3%)  | <b>OR 1.01</b><br>(0.1 to<br>10.09) | <b>Study population</b>                            |                                                     |
|                                                          |                         |                          |                         |                           |            |                                                                              |                  |                   |                                     | <b>2 per 1000</b>                                  | <b>0 more per 1000</b><br>(from 2 fewer to 19 more) |
|                                                          |                         |                          |                         |                           |            |                                                                              |                  |                   |                                     | <b>Moderate</b>                                    |                                                     |
|                                                          |                         |                          |                         |                           |            |                                                                              |                  |                   | <b>0 per 1000</b>                   | -                                                  |                                                     |

<sup>1</sup> Information from studies at high risk of bias.

<sup>2</sup> Very serious imprecision-lower boundary indicates appreciable benefit while upper boundary indicates appreciable harm

**(e) Anti-IL-17 agents vs. TNFi**

| Anti-IL-17 agents vs. TNFi - Serious infection |                         |                          |                         |                           |                  |                                                      |                       |                        |                                  |                              |                                                      |
|------------------------------------------------|-------------------------|--------------------------|-------------------------|---------------------------|------------------|------------------------------------------------------|-----------------------|------------------------|----------------------------------|------------------------------|------------------------------------------------------|
| Quality assessment                             |                         |                          |                         |                           |                  |                                                      | Summary of Findings   |                        |                                  |                              |                                                      |
| Participants (studies)<br>Follow up            | Risk of bias            | Inconsistency            | Indirectness            | Imprecision               | Publication bias | Overall quality of evidence                          | Study event rates (%) |                        | Relative effect (95% CI)         | Anticipated absolute effects |                                                      |
|                                                |                         |                          |                         |                           |                  |                                                      | With TNFi             | With Anti-IL-17 agents |                                  | Risk with TNFi               | Risk difference with Anti-IL-17 agents (95% CI)      |
| <b>Anti-IL-17 agents vs. TNFi</b>              |                         |                          |                         |                           |                  |                                                      |                       |                        |                                  |                              |                                                      |
| 4327 (2 studies)                               | no serious risk of bias | no serious inconsistency | no serious indirectness | very serious <sup>1</sup> | undetected       | ⊕⊕⊕⊕<br><b>LOW<sup>1</sup></b><br>due to imprecision | 7;1063 (0.7%)         | 21;3264 (0.6%)         | <b>OR 0.99</b><br>(0.42 to 2.34) | <b>Study population</b>      |                                                      |
|                                                |                         |                          |                         |                           |                  |                                                      |                       |                        |                                  | <b>7 per 1000</b>            | <b>0 fewer per 1000</b><br>(from 4 fewer to 9 more)  |
|                                                |                         |                          |                         |                           |                  |                                                      |                       |                        |                                  | <b>Moderate</b>              |                                                      |
|                                                |                         |                          |                         |                           |                  |                                                      |                       |                        |                                  | <b>8 per 1000</b>            | <b>0 fewer per 1000</b><br>(from 5 fewer to 11 more) |

<sup>1</sup> Very serious imprecision-lower boundary indicates appreciable benefit while upper boundary indicates appreciable harm.

**(f) Anti-IL-17 agents vs. Anti-IL-12/23 agents**

| Anti-IL-17 agents vs. Anti-IL-12/23 agents - Serious infection |                         |                          |                         |                           |                  |                                                      |                           |                        |                                  |                                |                                                     |
|----------------------------------------------------------------|-------------------------|--------------------------|-------------------------|---------------------------|------------------|------------------------------------------------------|---------------------------|------------------------|----------------------------------|--------------------------------|-----------------------------------------------------|
| Quality assessment                                             |                         |                          |                         |                           |                  |                                                      | Summary of Findings       |                        |                                  |                                |                                                     |
| Participants (studies)<br>Follow up                            | Risk of bias            | Inconsistency            | Indirectness            | Imprecision               | Publication bias | Overall quality of evidence                          | Study event rates (%)     |                        | Relative effect (95% CI)         | Anticipated absolute effects   |                                                     |
|                                                                |                         |                          |                         |                           |                  |                                                      | With Anti-IL-12/23 agents | With Anti-IL-17 agents |                                  | Risk with Anti-IL-12/23 agents | Risk difference with Anti-IL-17 agents (95% CI)     |
| <b>Anti-IL-17 agents vs. Ustekinumab</b>                       |                         |                          |                         |                           |                  |                                                      |                           |                        |                                  |                                |                                                     |
| 5834 (5 studies)                                               | no serious risk of bias | no serious inconsistency | no serious indirectness | very serious <sup>1</sup> | undetected       | ⊕⊕⊕⊕<br><b>LOW<sup>1</sup></b><br>due to imprecision | 12/1992 (0.6%)            | 19/3842 (0.5%)         | <b>OR 0.95</b><br>(0.44 to 2.05) | <b>Study population</b>        |                                                     |
|                                                                |                         |                          |                         |                           |                  |                                                      |                           |                        |                                  | <b>6 per 1000</b>              | <b>0 fewer per 1000</b><br>(from 3 fewer to 6 more) |
|                                                                |                         |                          |                         |                           |                  |                                                      |                           |                        |                                  | <b>Moderate</b>                |                                                     |
|                                                                |                         |                          |                         |                           |                  |                                                      |                           |                        |                                  | <b>6 per 1000</b>              | <b>0 fewer per 1000</b><br>(from 3 fewer to 6 more) |

<sup>1</sup> Very serious imprecision-lower boundary indicates appreciable benefit while upper boundary indicates appreciable harm.

**(g) Anti-IL-12/23 agents vs. TNFi**

| <b>Anti-IL-12/23 agents vs. TNFi - Serious infection</b> |                         |                          |                         |                           |                  |                                                       |                       |                           |                                  |                              |                                                     |
|----------------------------------------------------------|-------------------------|--------------------------|-------------------------|---------------------------|------------------|-------------------------------------------------------|-----------------------|---------------------------|----------------------------------|------------------------------|-----------------------------------------------------|
| Quality assessment                                       |                         |                          |                         |                           |                  |                                                       | Summary of Findings   |                           |                                  |                              |                                                     |
| Participants (studies)<br>Follow up                      | Risk of bias            | Inconsistency            | Indirectness            | Imprecision               | Publication bias | Overall quality of evidence                           | Study event rates (%) |                           | Relative effect (95% CI)         | Anticipated absolute effects |                                                     |
|                                                          |                         |                          |                         |                           |                  |                                                       | With TNFi             | With Anti-IL-12/23 agents |                                  | Risk with TNFi               | Risk difference with Anti-IL-12/23 agents (95% CI)  |
| <b>Ustekinumab vs. Etanercept</b>                        |                         |                          |                         |                           |                  |                                                       |                       |                           |                                  |                              |                                                     |
| 2557 (4 studies)                                         | no serious risk of bias | no serious inconsistency | no serious indirectness | very serious <sup>1</sup> | undetected       | ⊕⊕⊕⊕<br><b>LOW</b> <sup>1</sup><br>due to imprecision | 8/1377 (0.6%)         | 10/1180 (0.8%)            | <b>OR 1.67</b><br>(0.63 to 4.42) | <b>Study population</b>      |                                                     |
|                                                          |                         |                          |                         |                           |                  |                                                       |                       |                           |                                  | <b>6 per 1000</b>            | <b>4 more per 1000</b><br>(from 2 fewer to 19 more) |
|                                                          |                         |                          |                         |                           |                  |                                                       |                       |                           |                                  | <b>Moderate</b>              |                                                     |
|                                                          |                         |                          |                         |                           |                  |                                                       |                       |                           |                                  | <b>6 per 1000</b>            | <b>4 more per 1000</b><br>(from 2 fewer to 20 more) |

<sup>1</sup>Very serious imprecision-lower boundary indicates appreciable benefit while upper boundary indicates appreciable harm.
